# Supplementary material for: Molecular Basis of XRN2-Deficient Cancer Cell Sensitivity to Poly(ADP-ribose) Polymerase Inhibition
Source: MDPI journal article supplement (doi:10.3390/cancers16030595), 2024-01-30

## **Supplementary Materials**

### **Molecular basis of XRN2-deficient cancer cell sensitivity to PARP inhibition**

Talysa Viera, Quinn Abfalterer, Alyssa Neal, Richard Trujillo, Praveen L. Patidar\*

Department of Chemistry, New Mexico Institute of Mining and Technology, Socorro,  
NM, 87801, USA

\*To whom correspondence should be addressed: Praveen L. Patidar, Department of Chemistry, New Mexico Institute of Mining and Technology, 801 Leroy Pl., Socorro, NM, 87801, USA; Email: Praveen.Patidar@nmt.edu; Phone: +1 575 835 5168; Fax: +1 575 835 5364

**Figure S1 Figure 1C Supplementary**

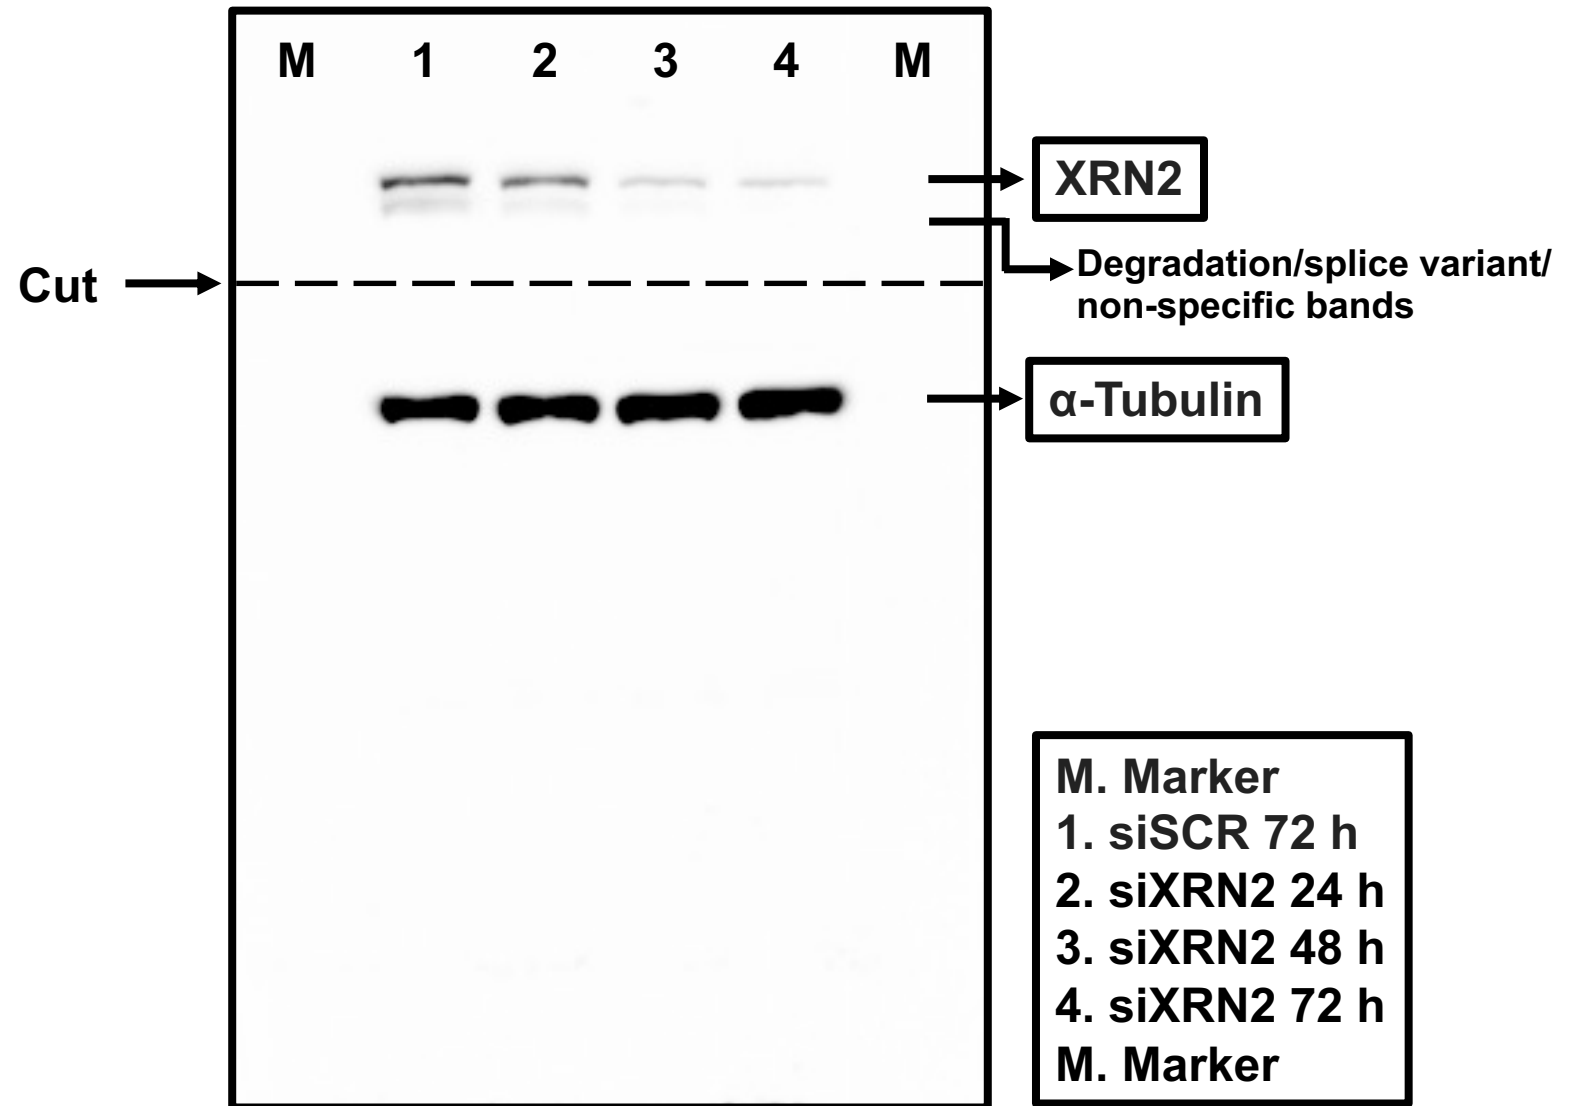

**Figure S1 Figure 1F Supplementary**

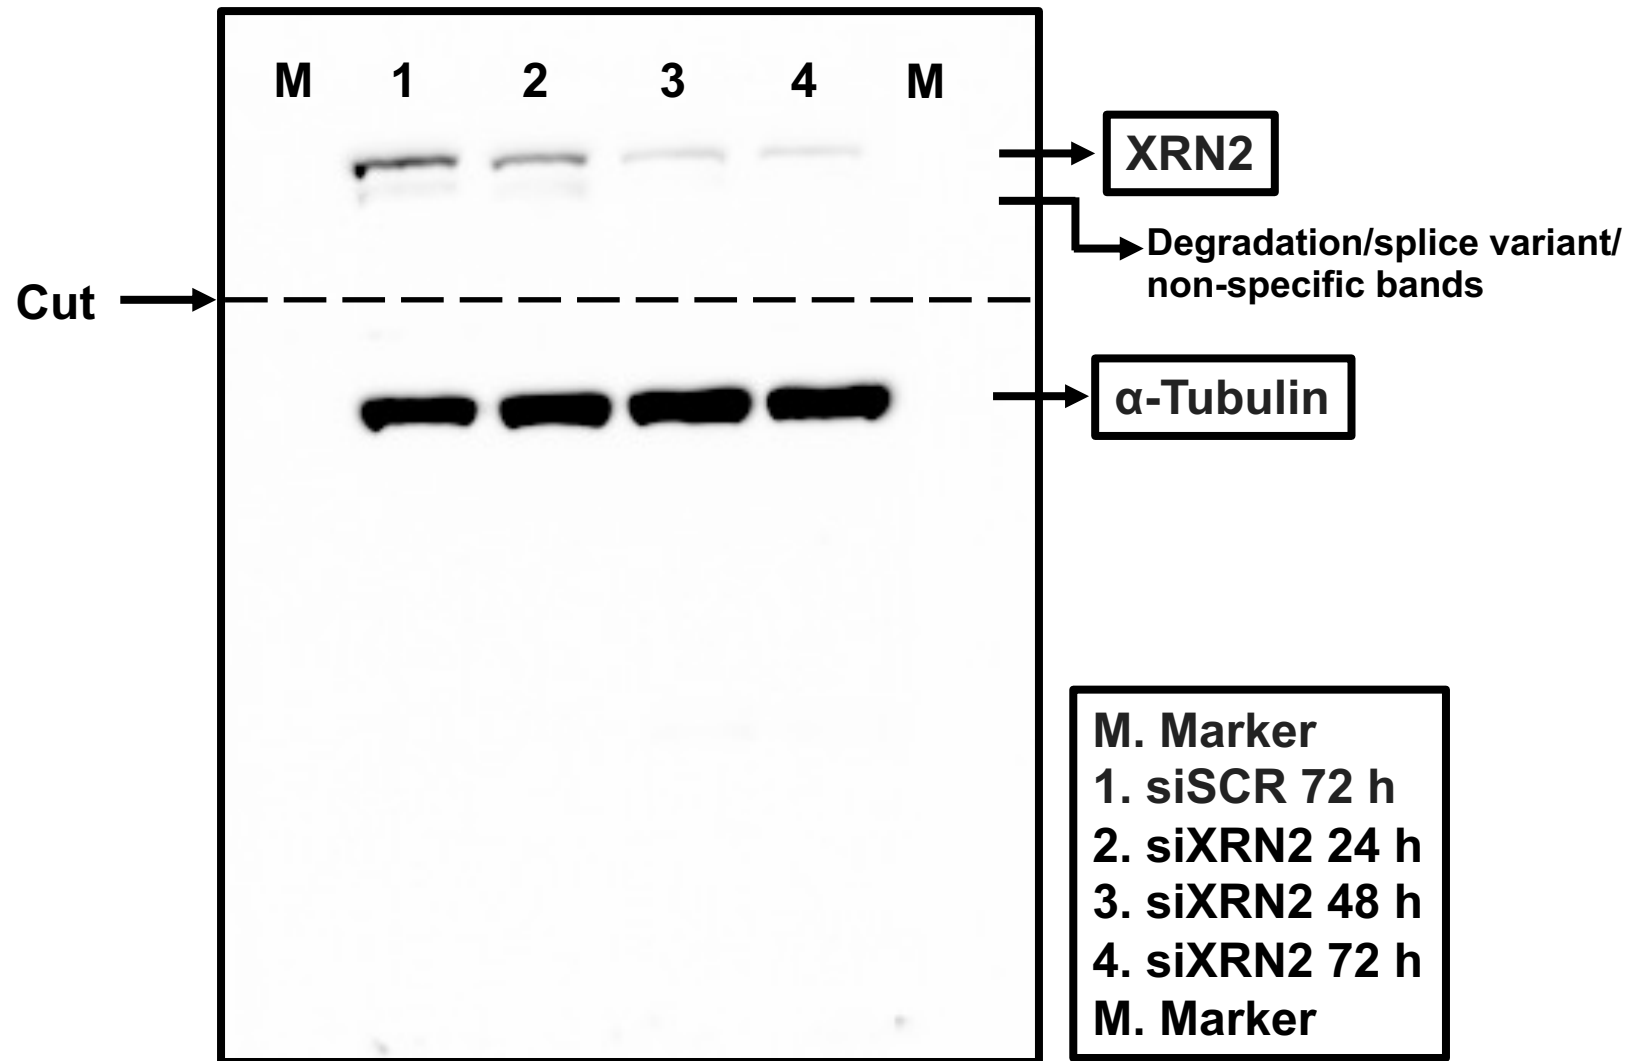

**Figure S1**

**Figure 1I Supplementary**

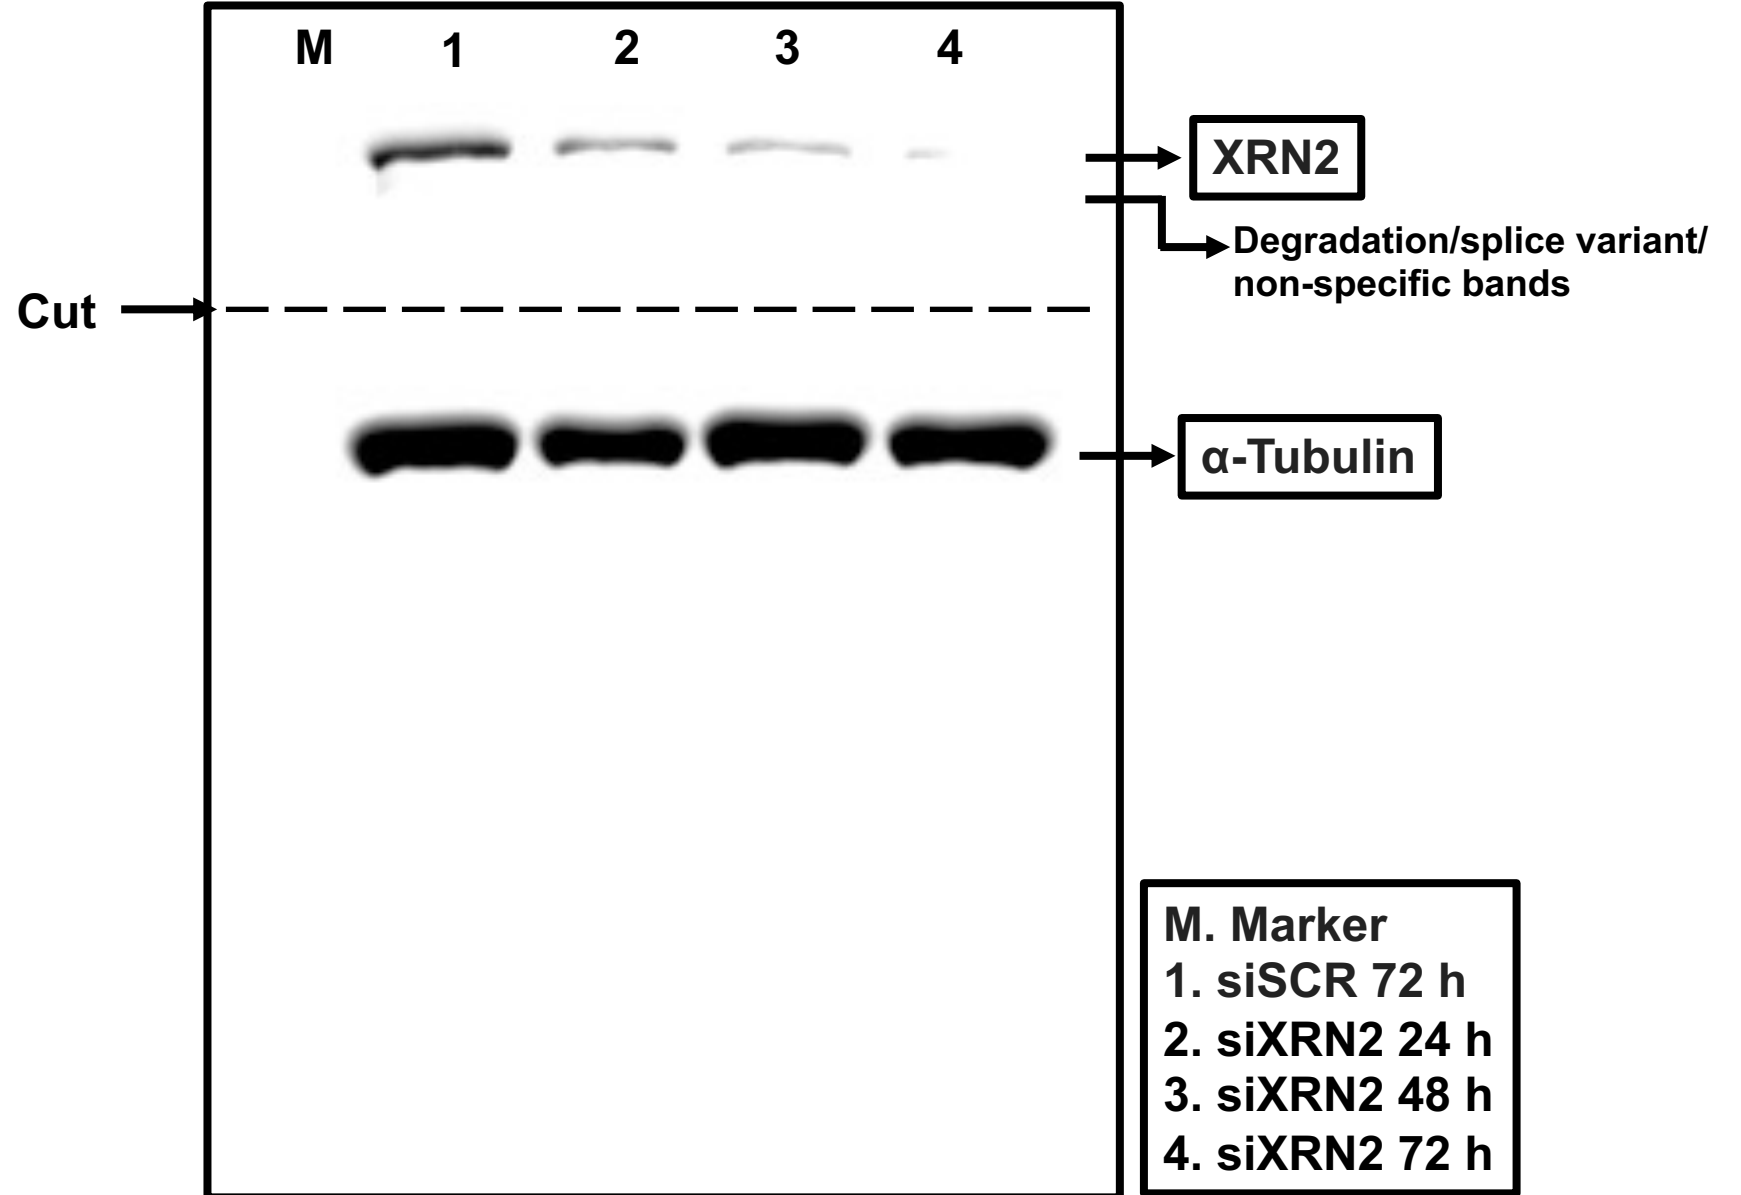

**Figure S1 Figure 1L Supplementary**

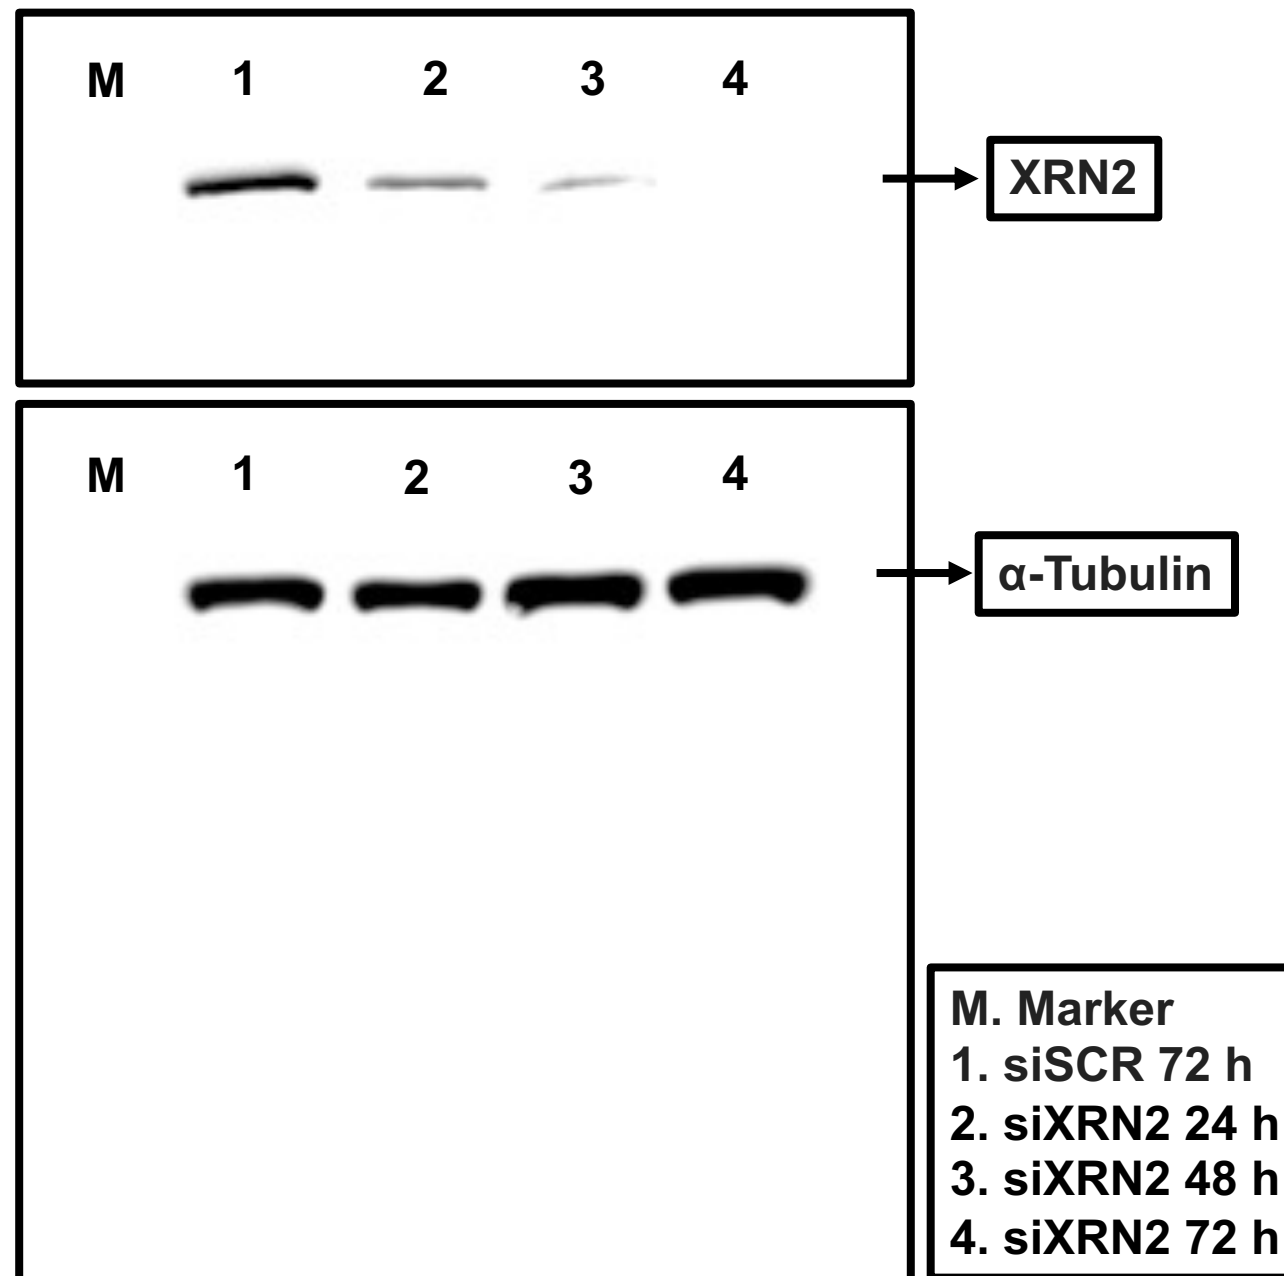

**Figure S2 Figure 2D Supplementary**

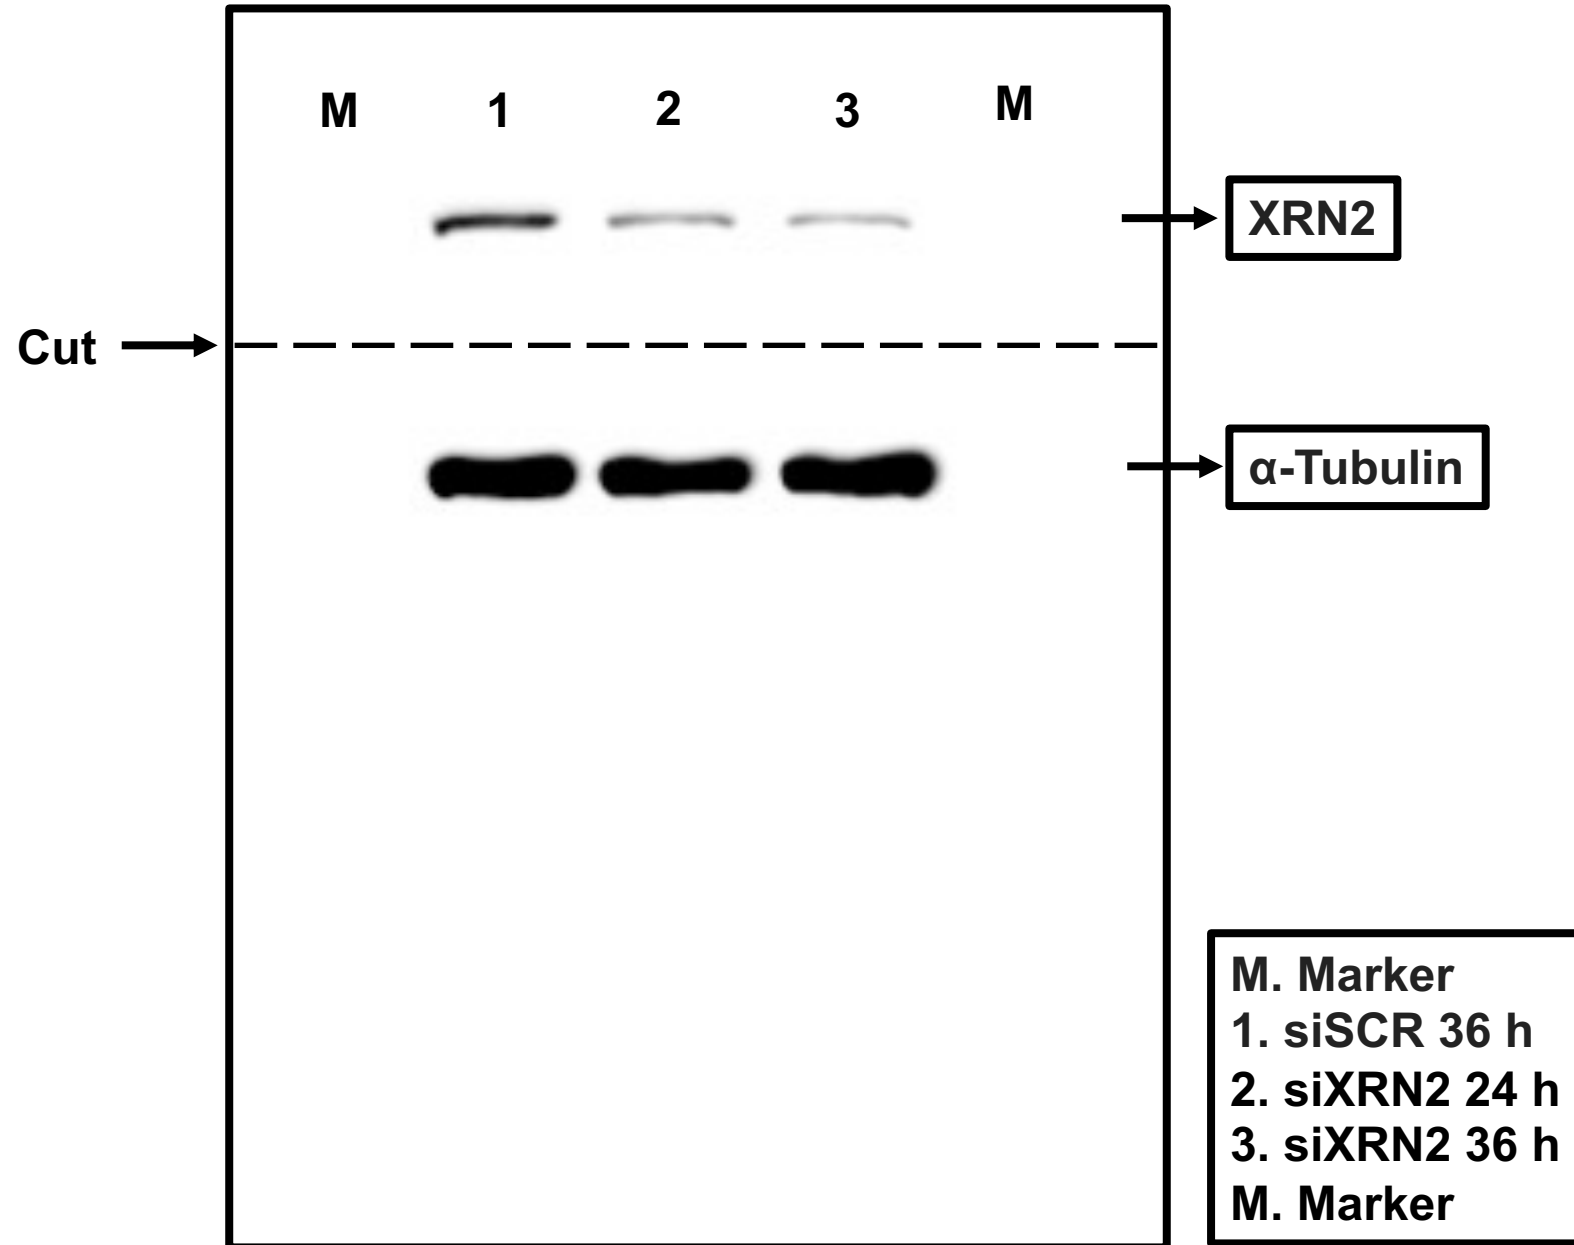

**Figure S2 Figure 2G Supplementary**

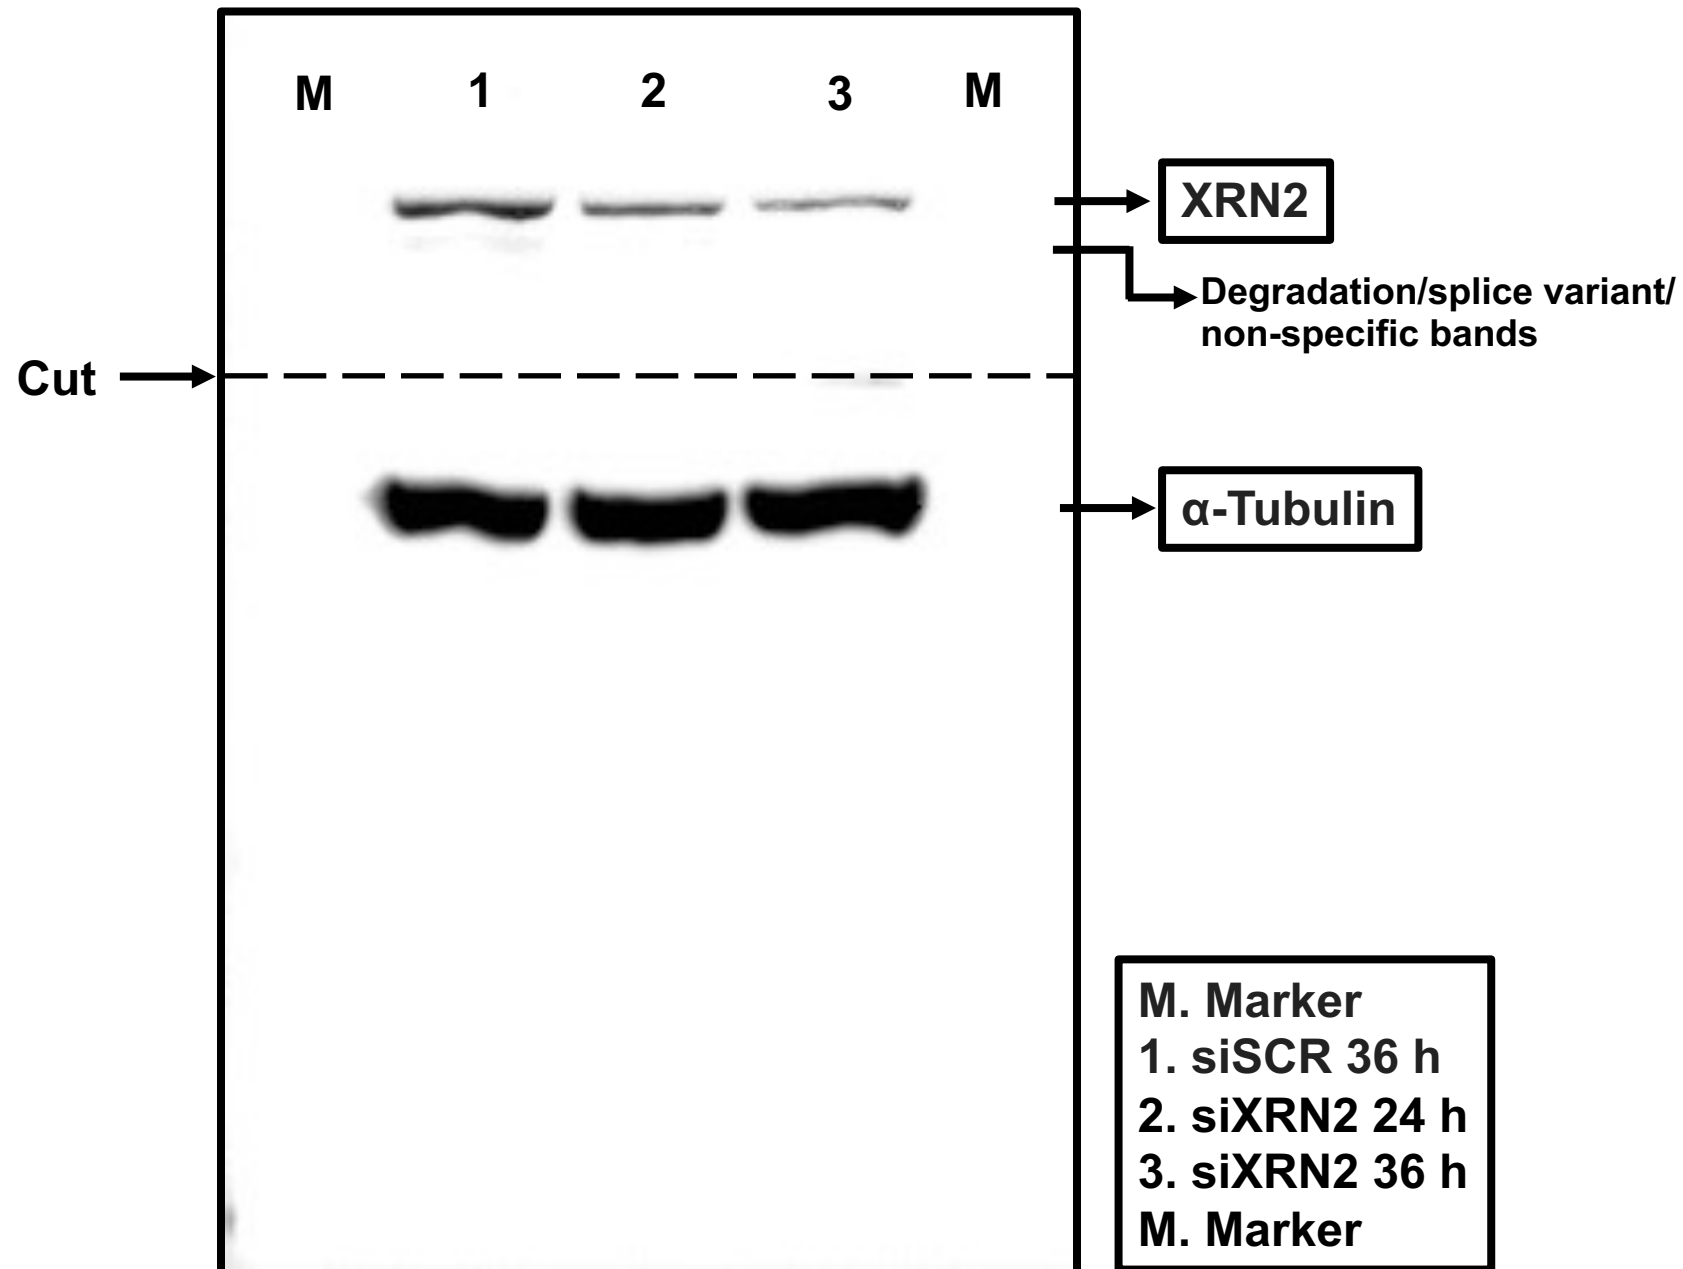

**Figure S3 Figure 3C Supplementary**

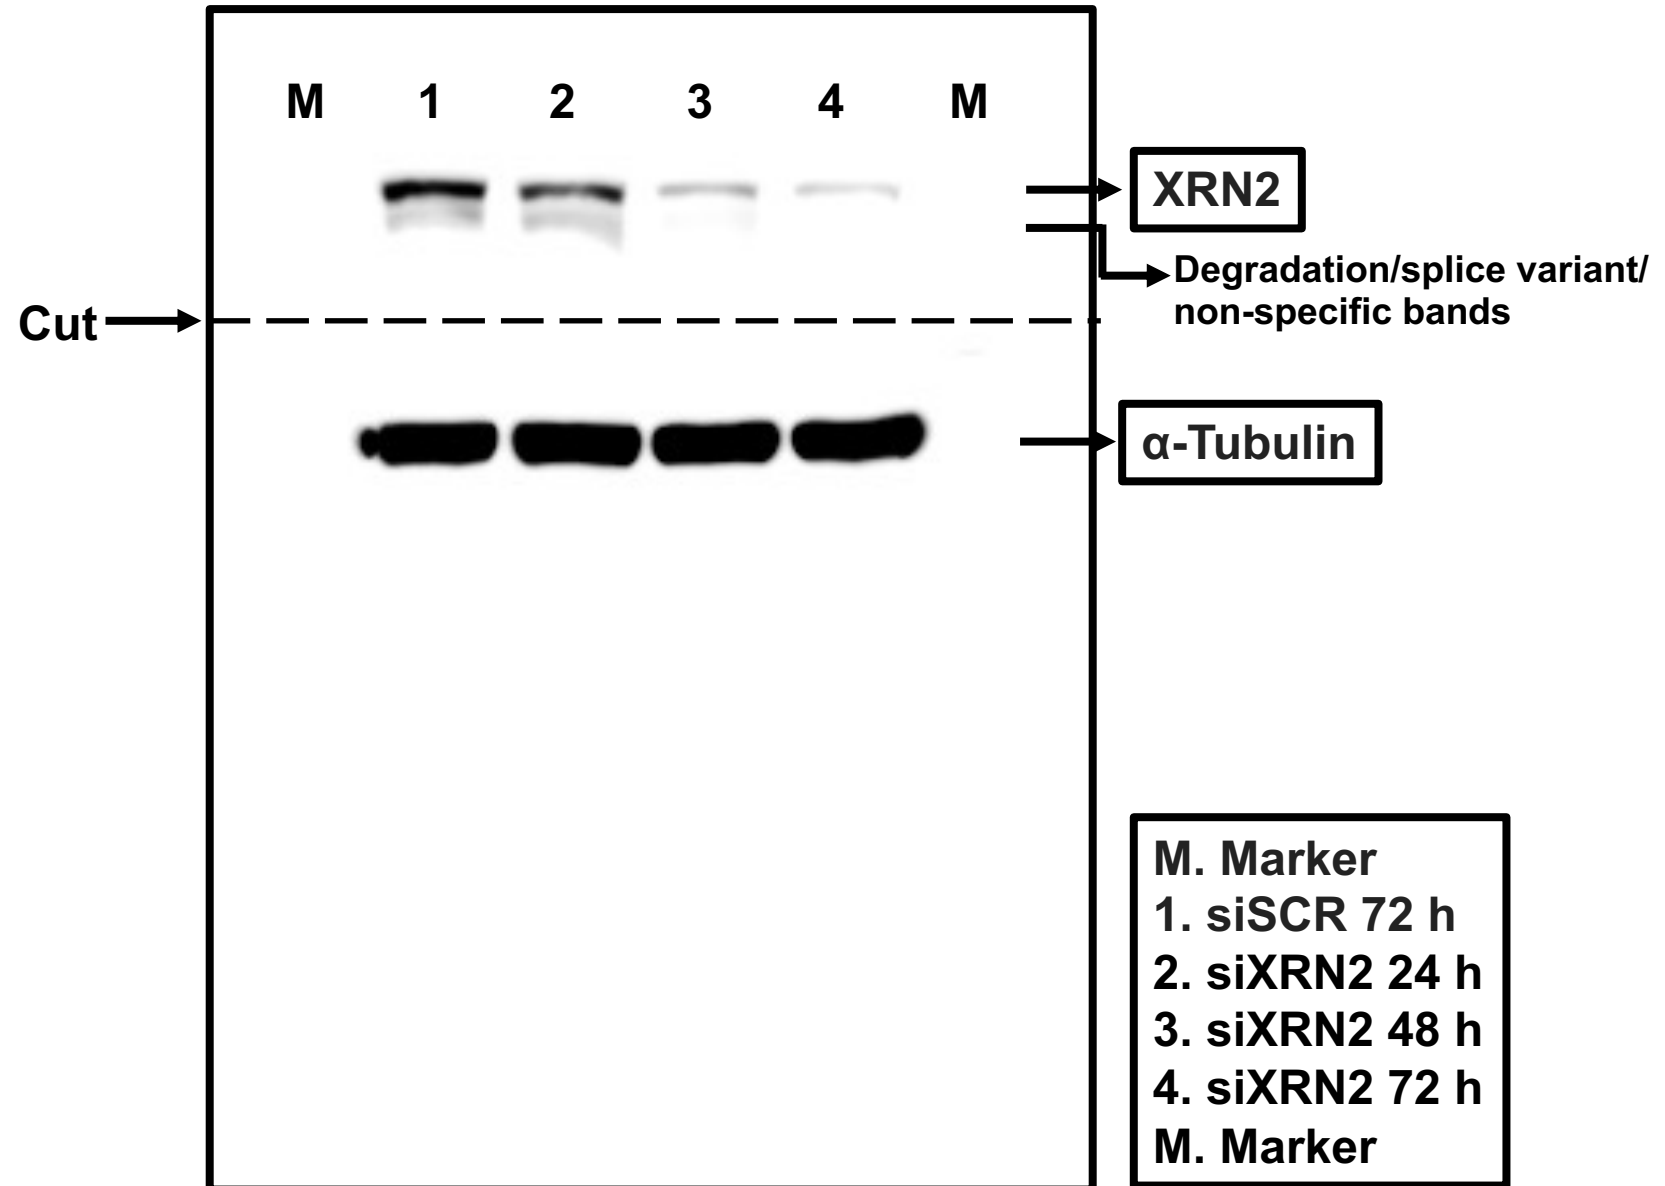

**Figure S3 Figure 3F Supplementary**

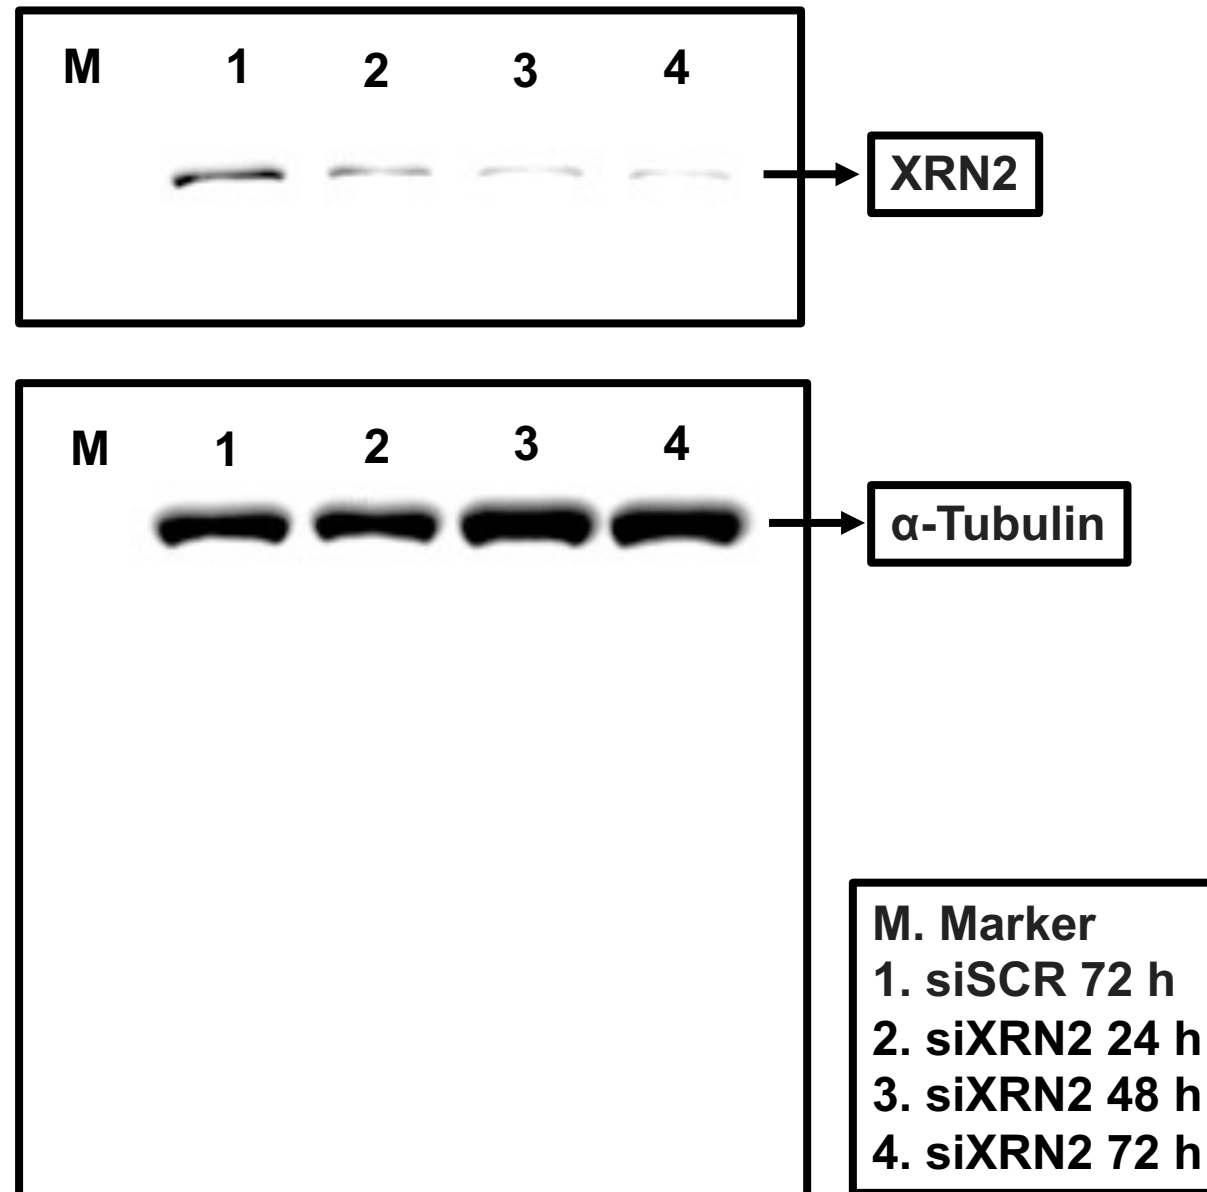

**Figure S4 Figure 4D Supplementary**

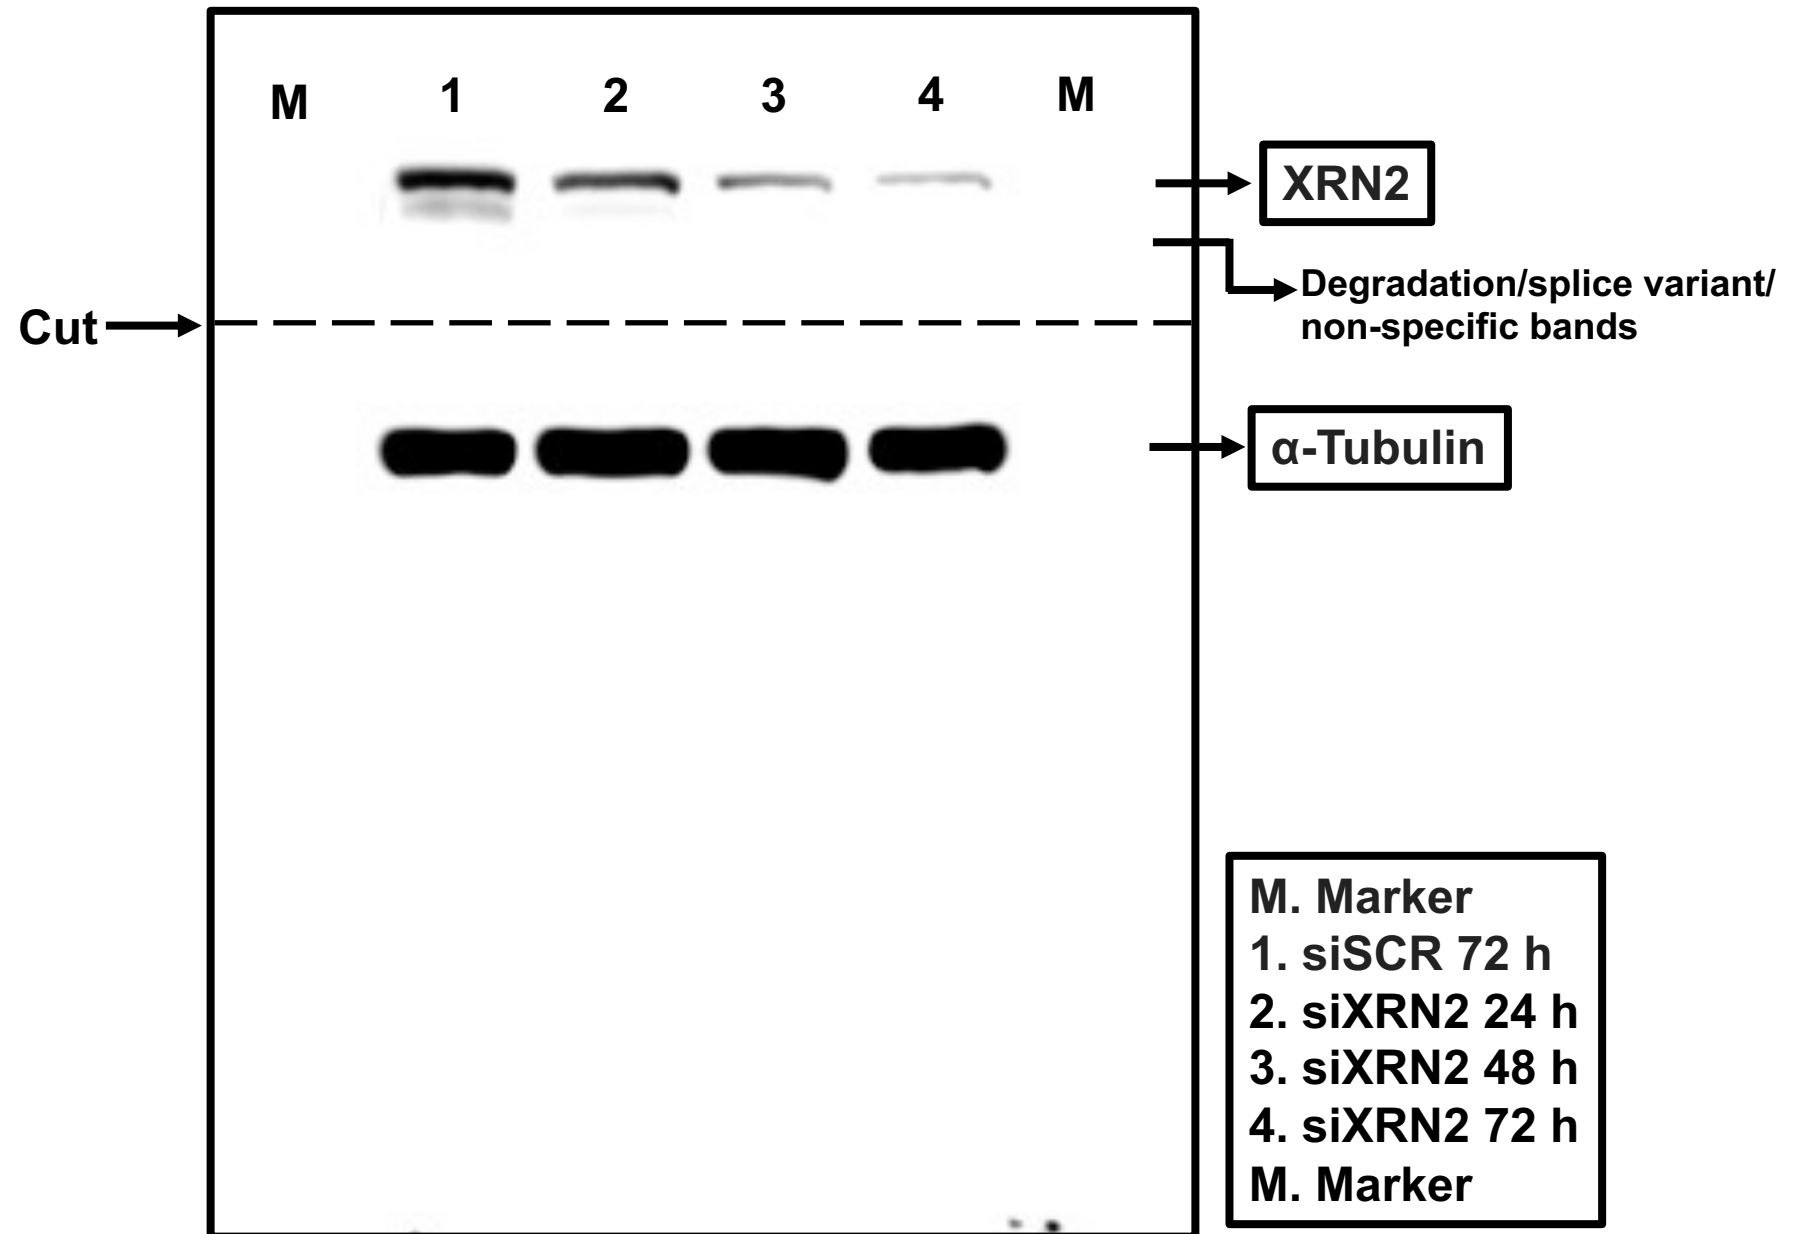

**Figure S4    Figure 4H Supplementary**

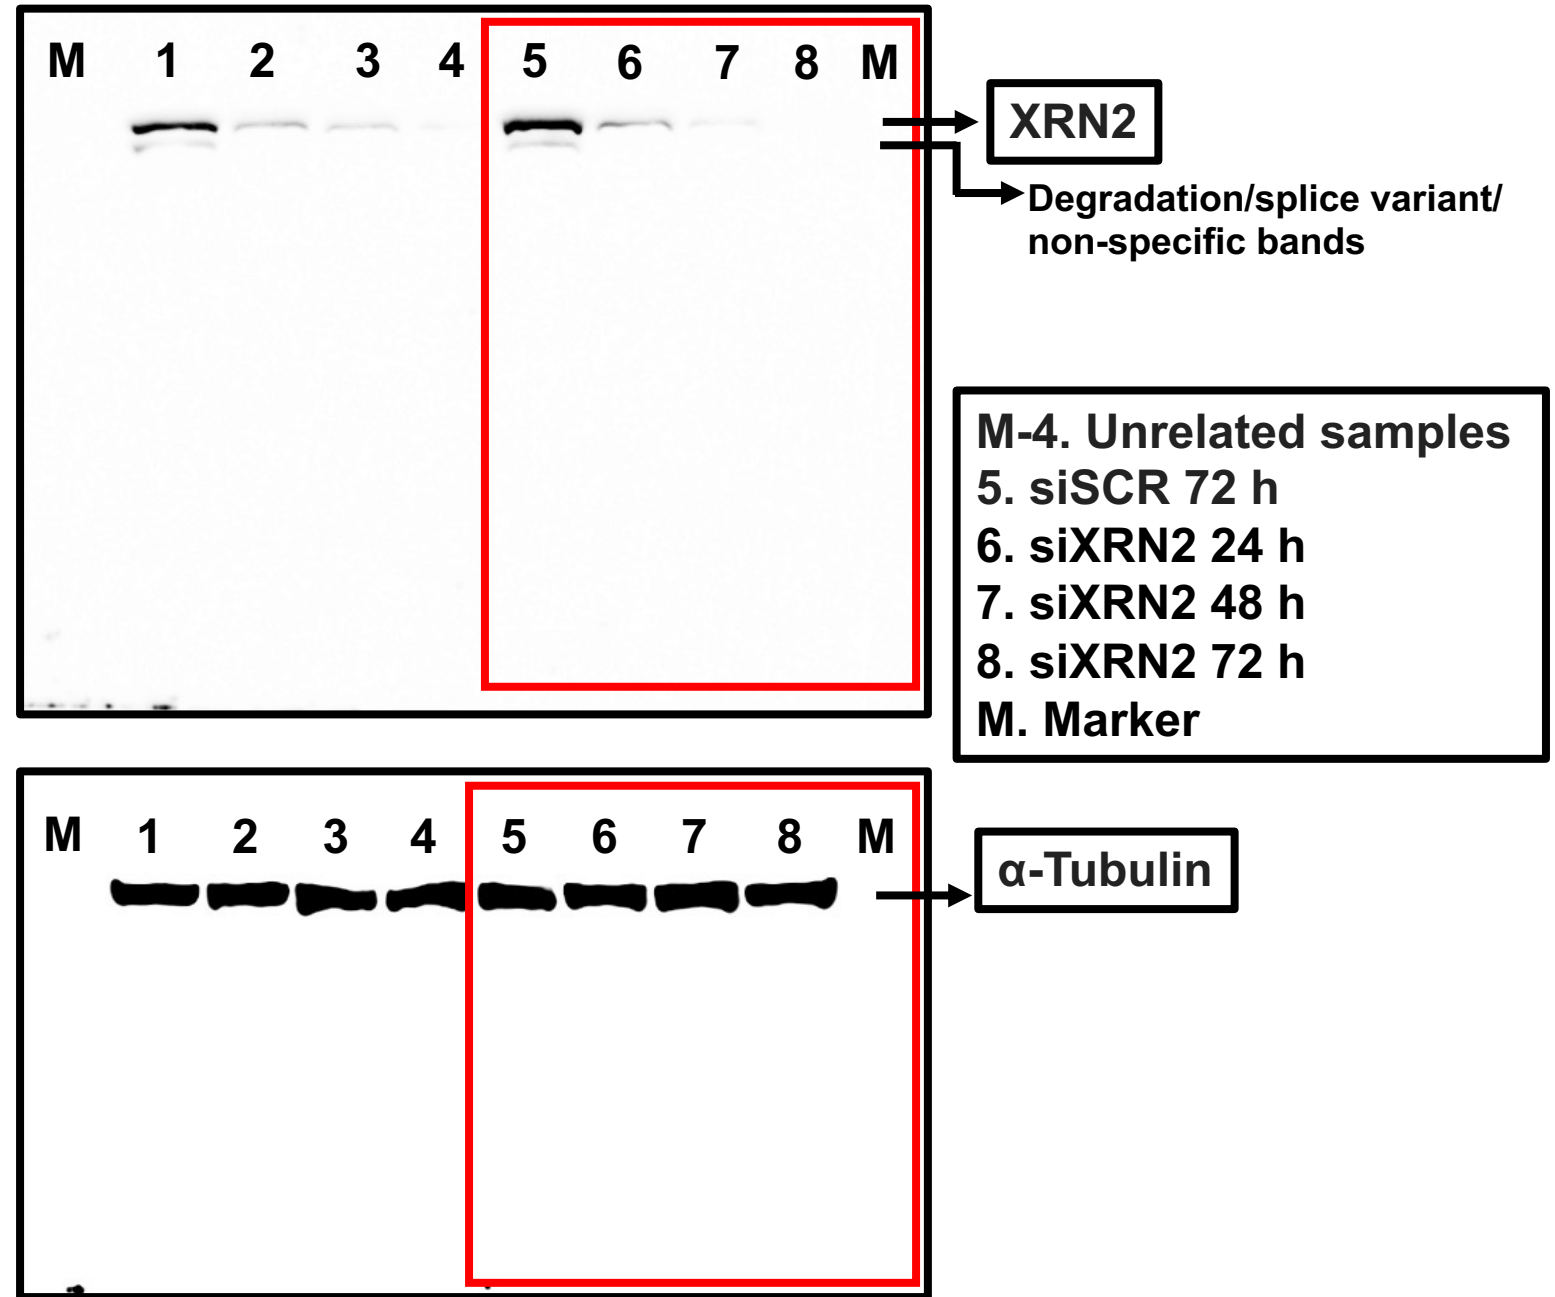

**Figure S5 Figure 5B Supplementary**

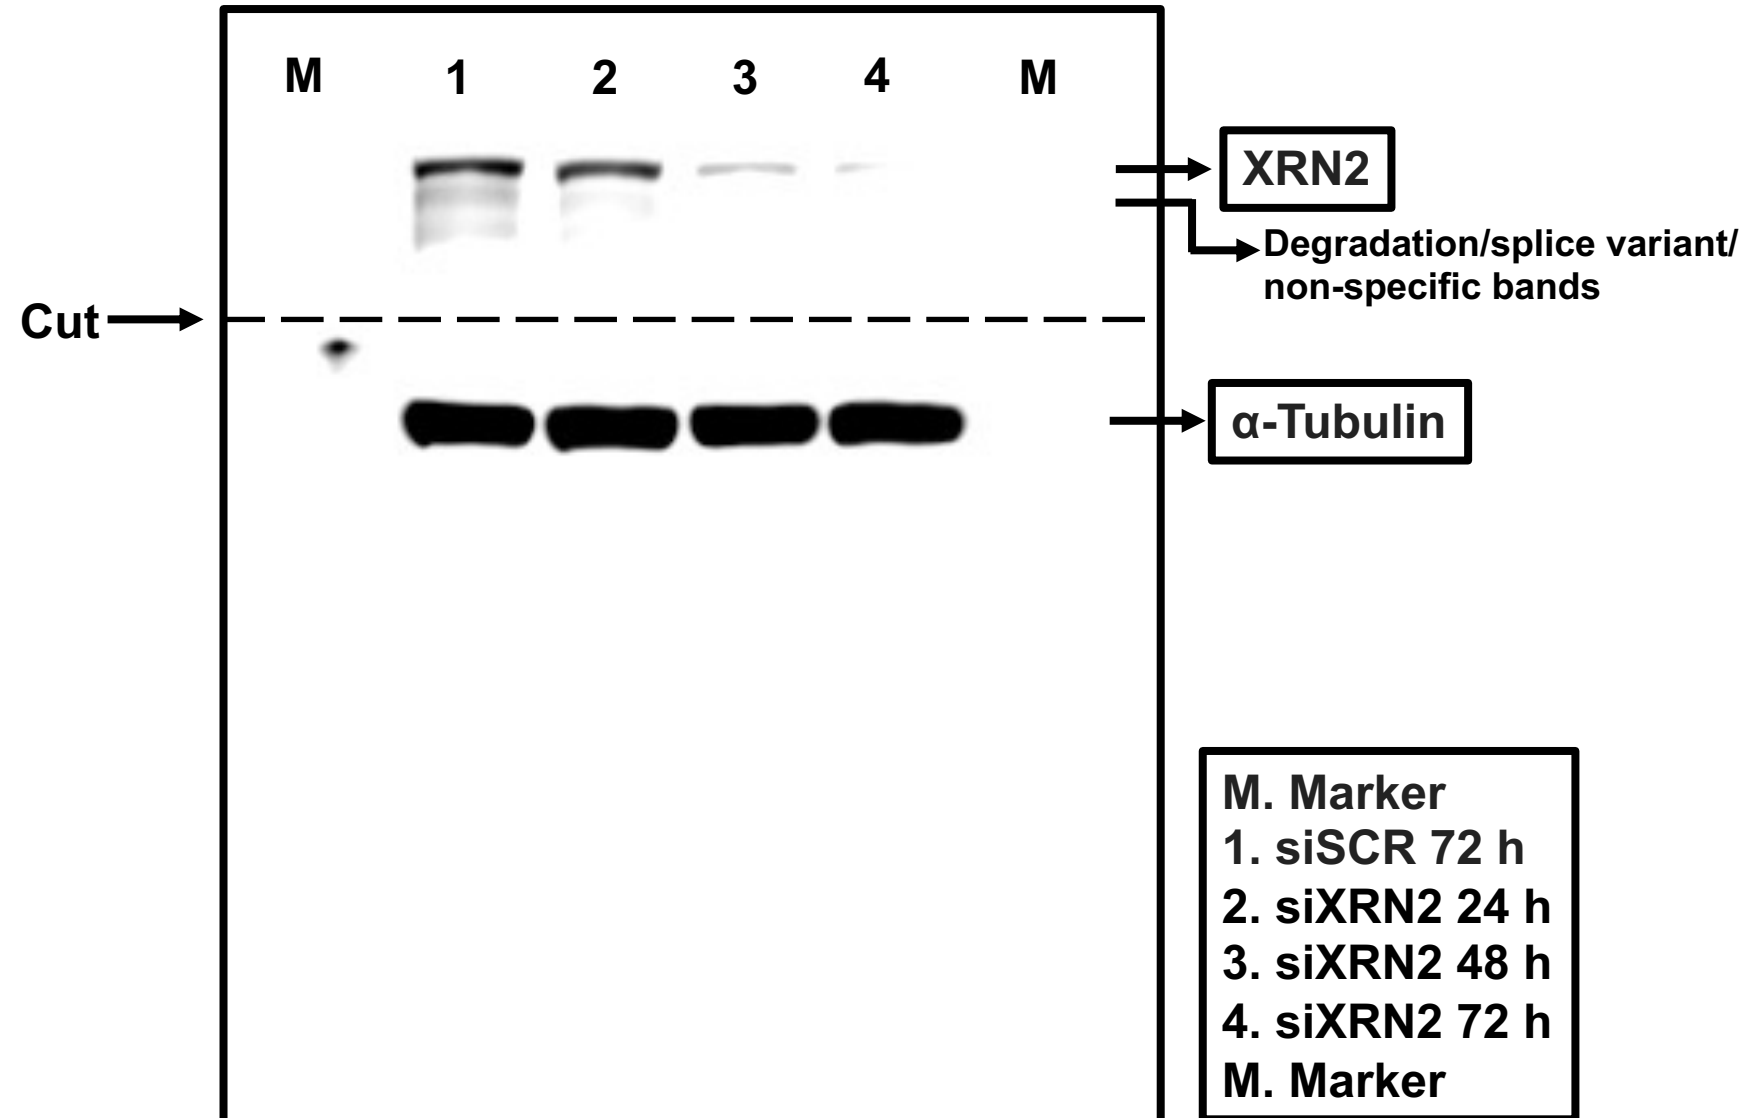

**Figure S5 Figure 5D Supplementary**

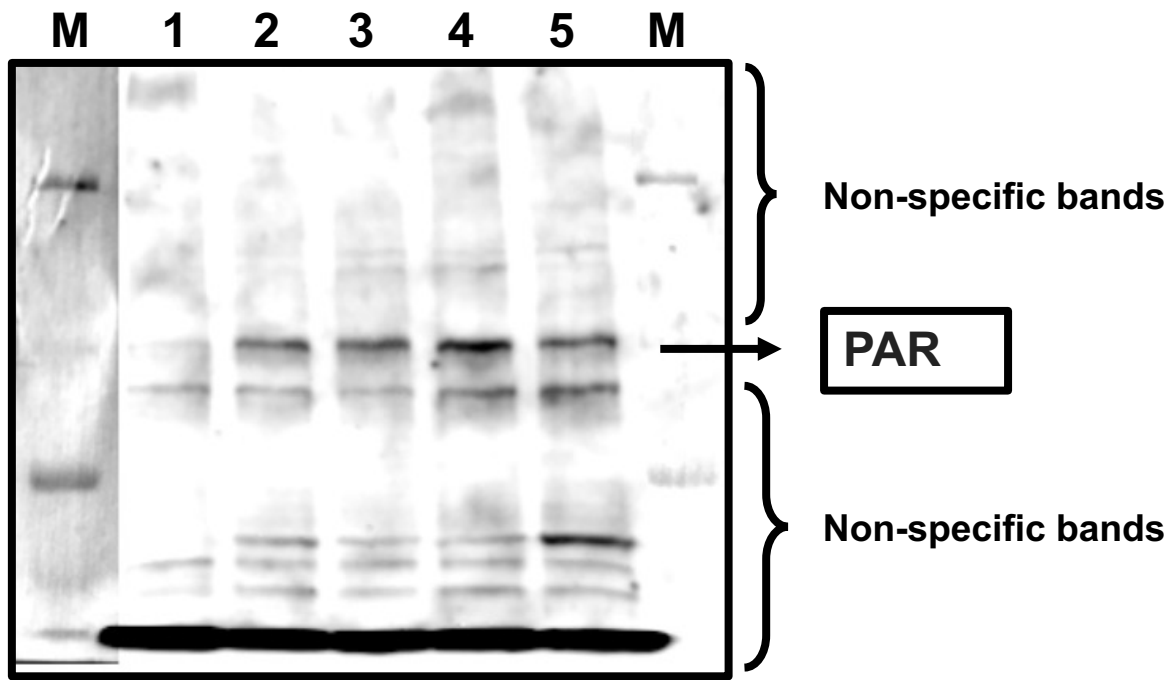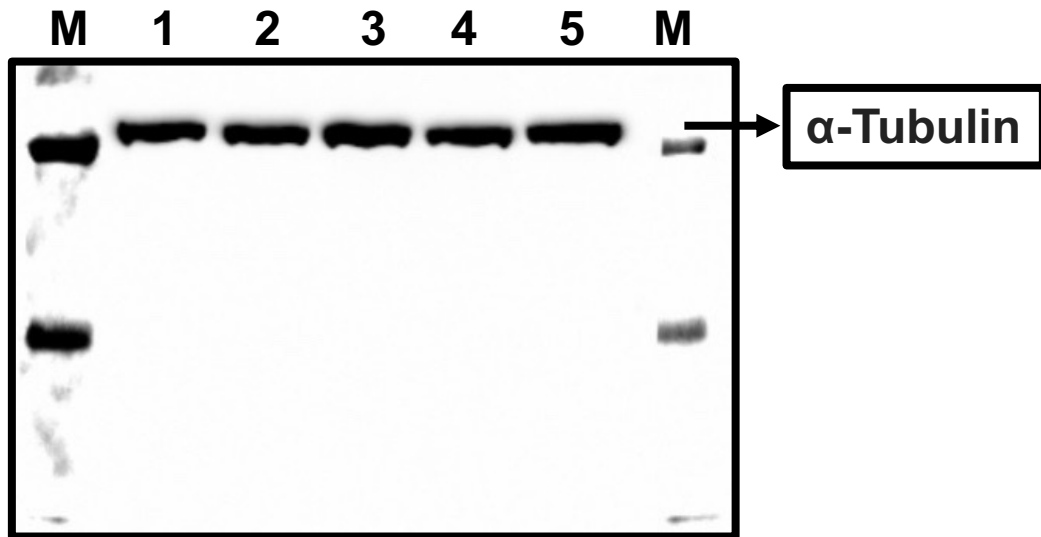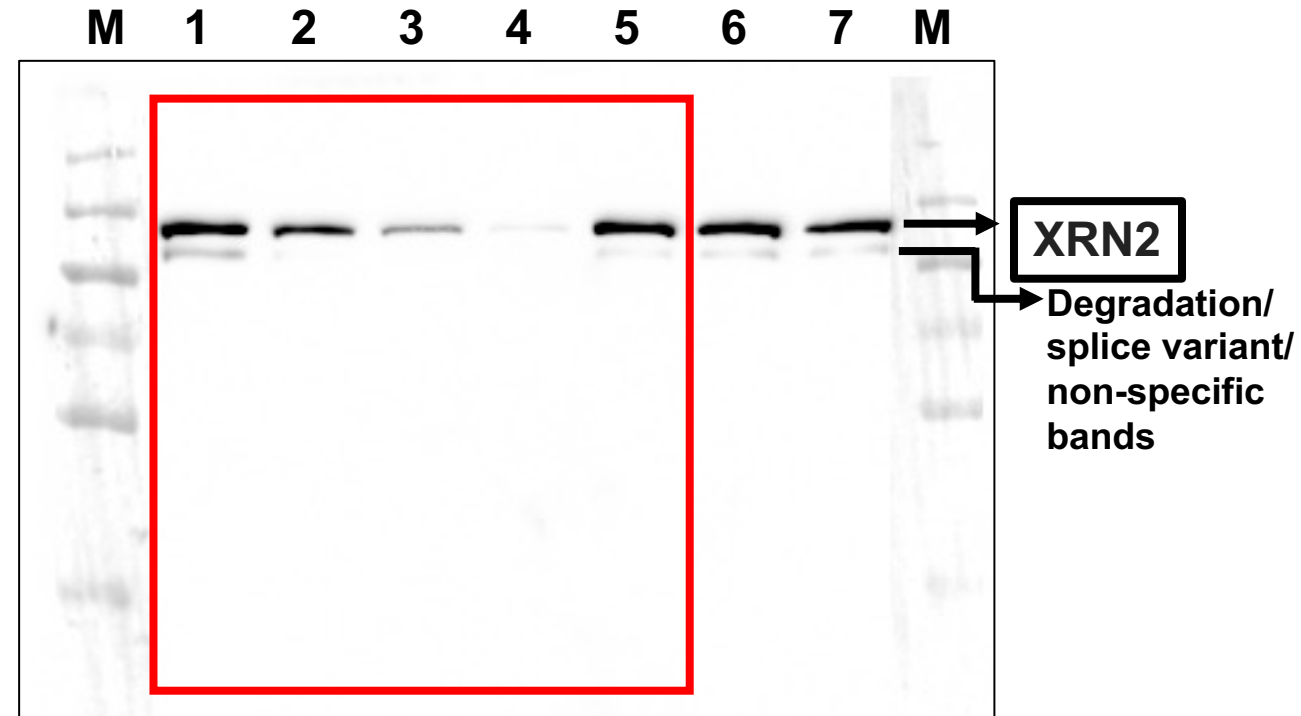

M. Marker  
1. siSCR 72 h  
2. siXRN2 24 h  
3. siXRN2 48 h  
4. siXRN2 72 h  
5. H<sub>2</sub>O<sub>2</sub>  
6-7. Unrelated  
M. Marker

Figure S5 Figure 5E Supplementary

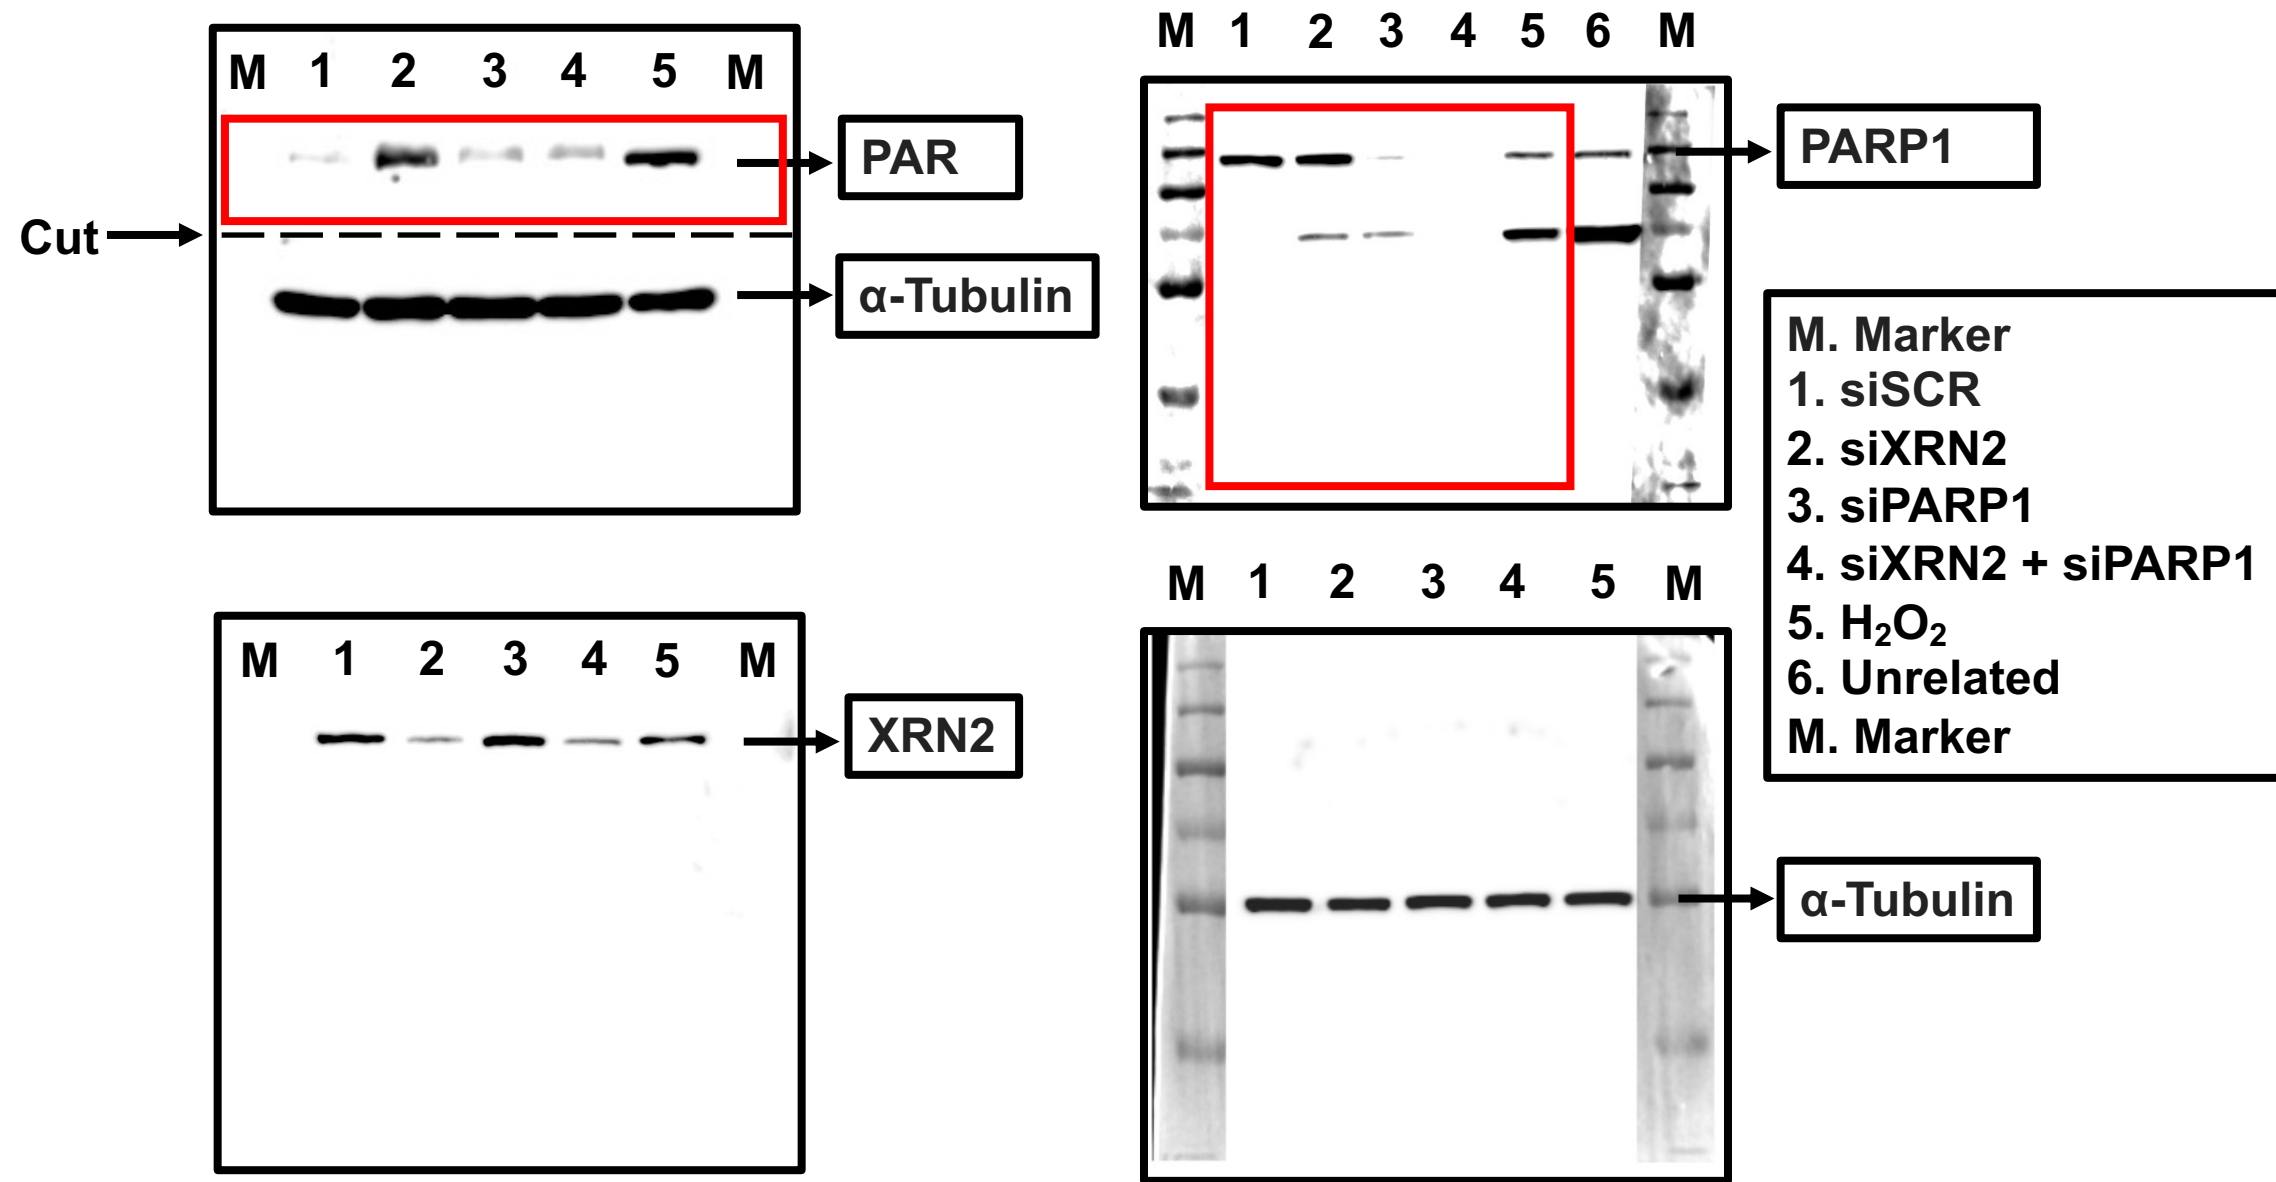

**Figure S5 Figure 5I Supplementary**

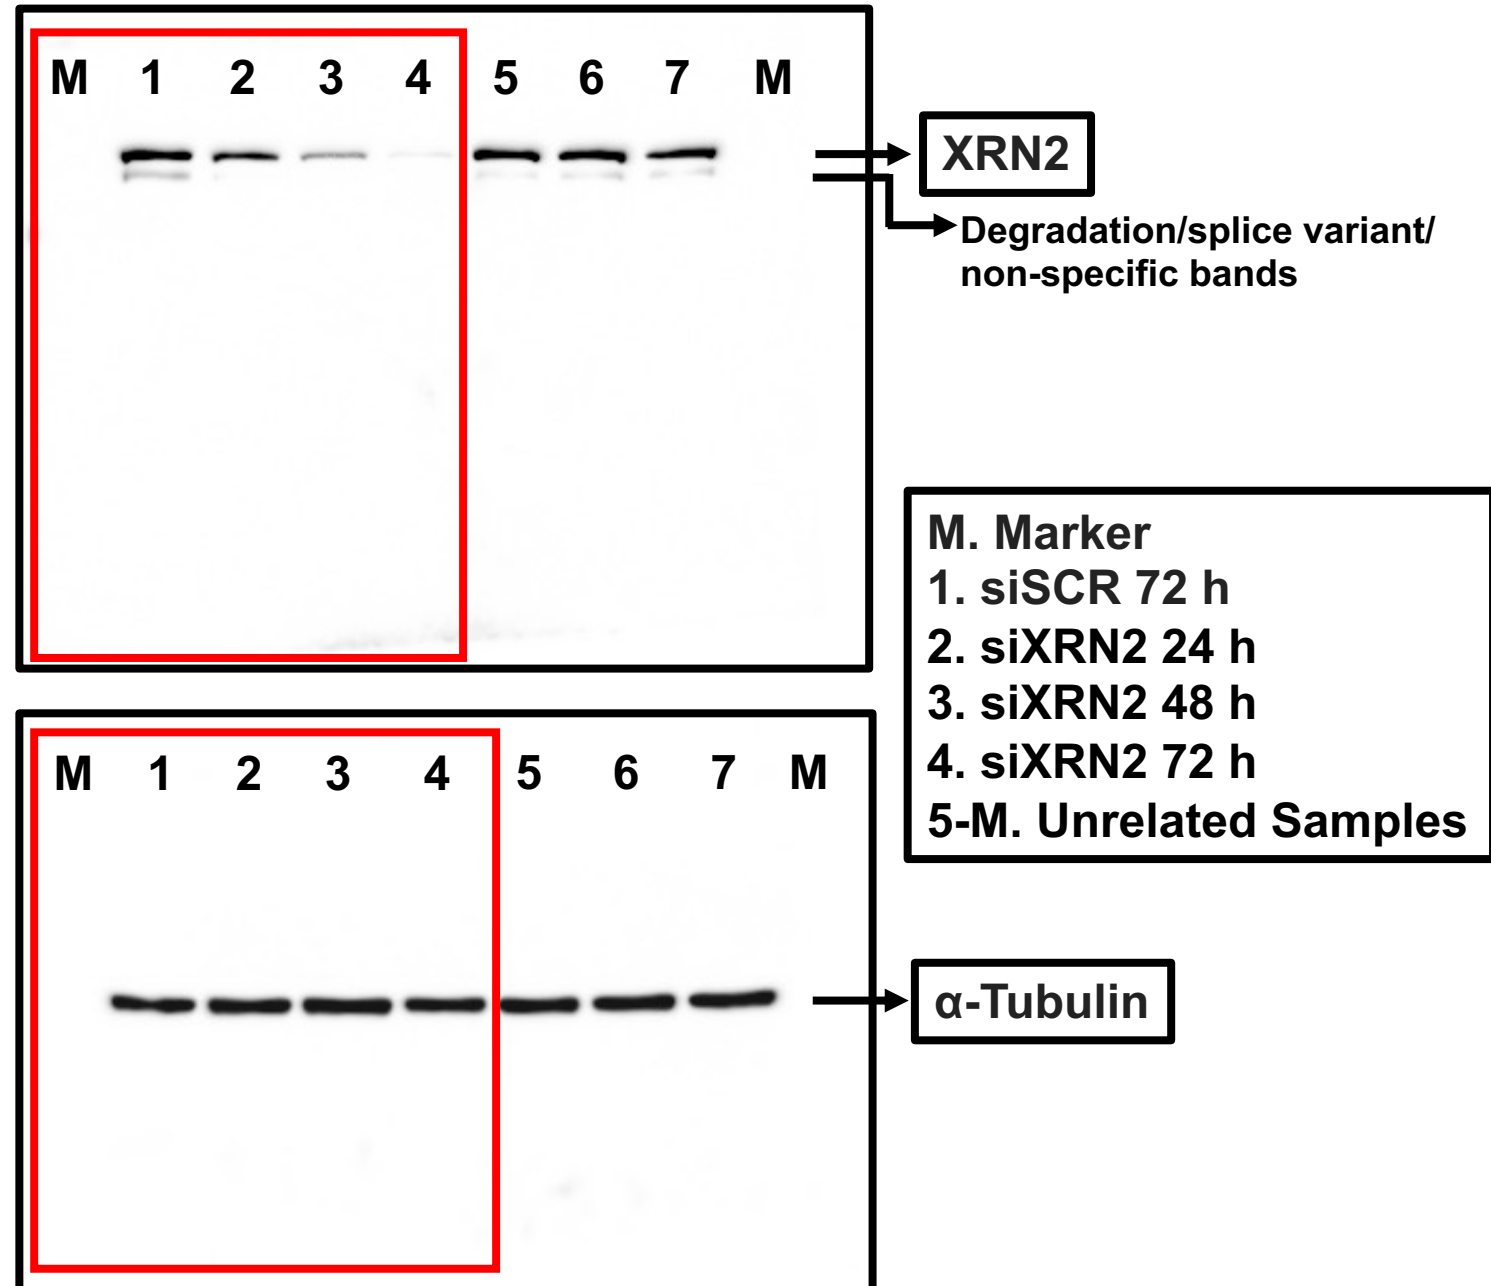

**Figure S6 Figure 6D Supplementary**

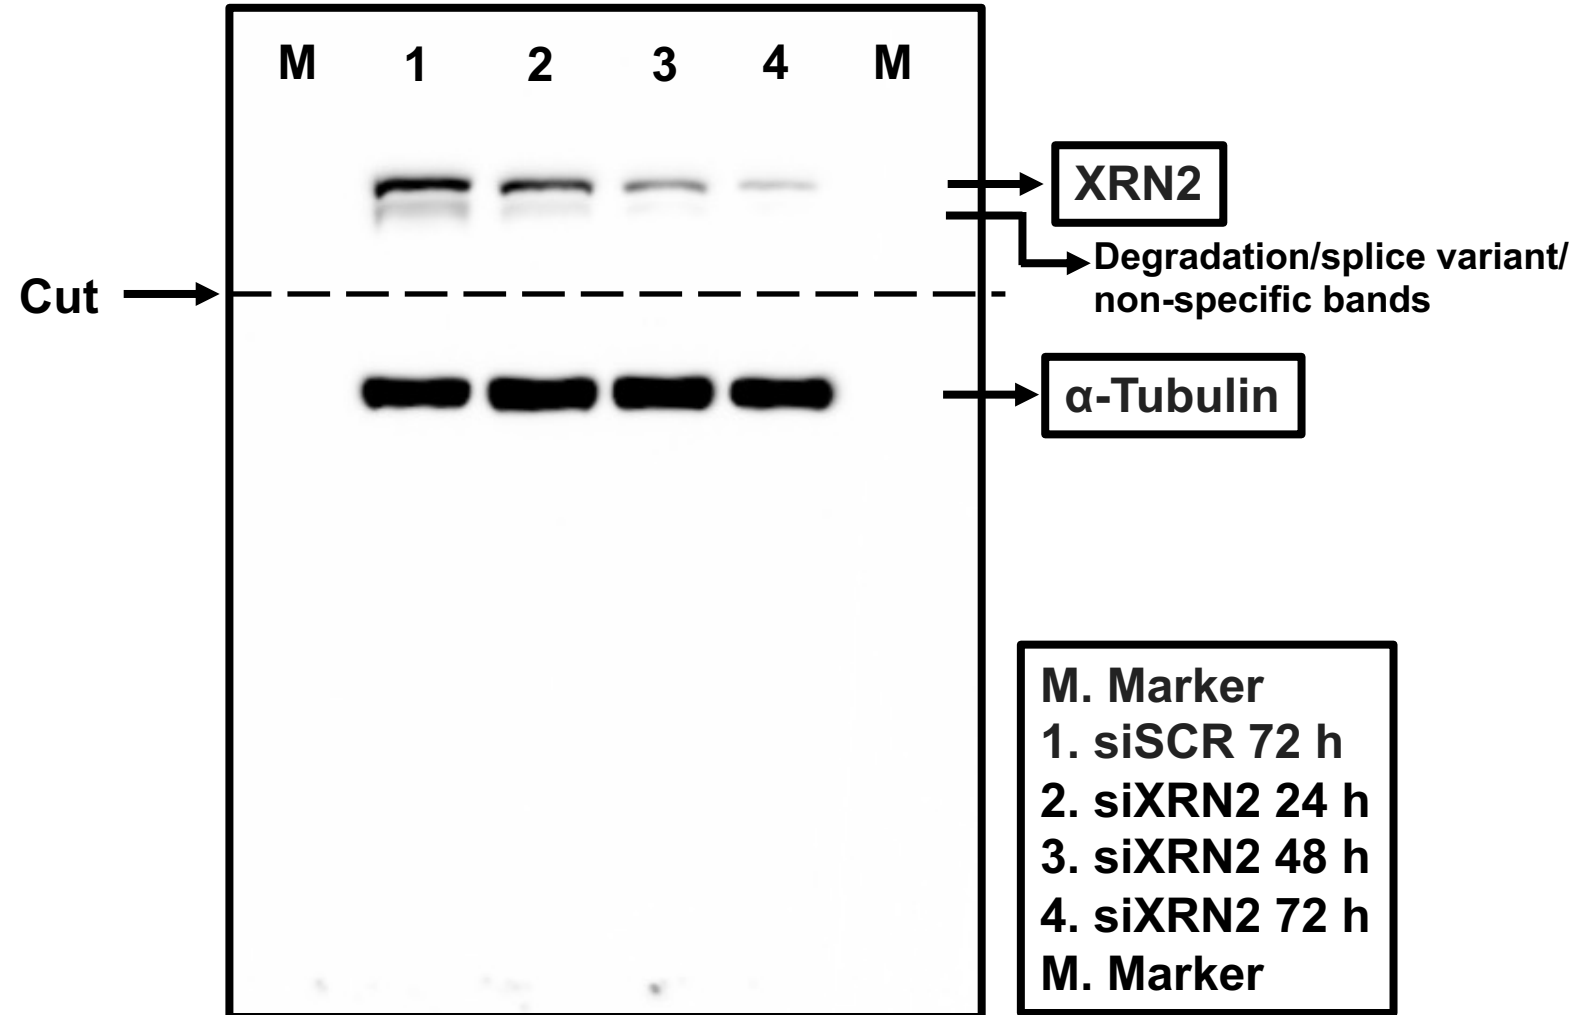

**Figure S6 Figure 6H Supplementary**

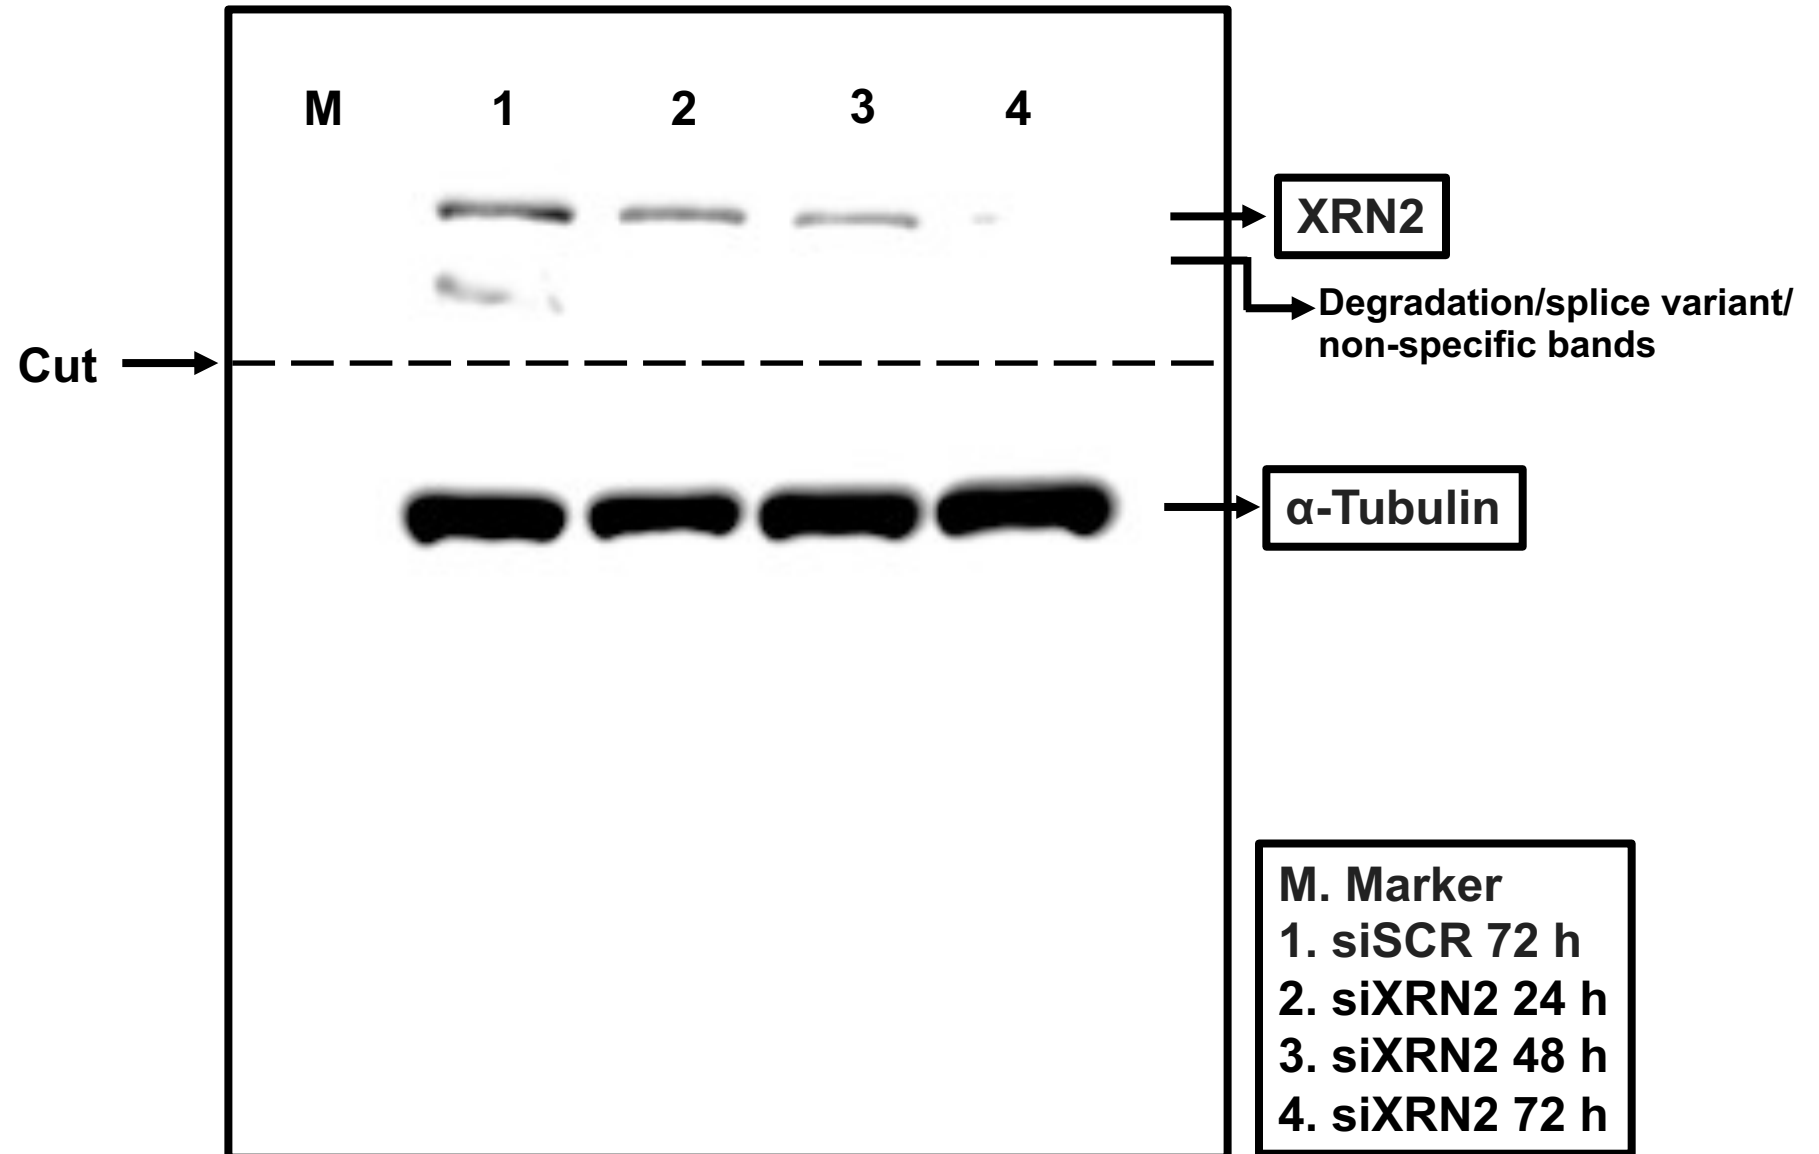

**Figure S7 Figure 7C Supplementary**

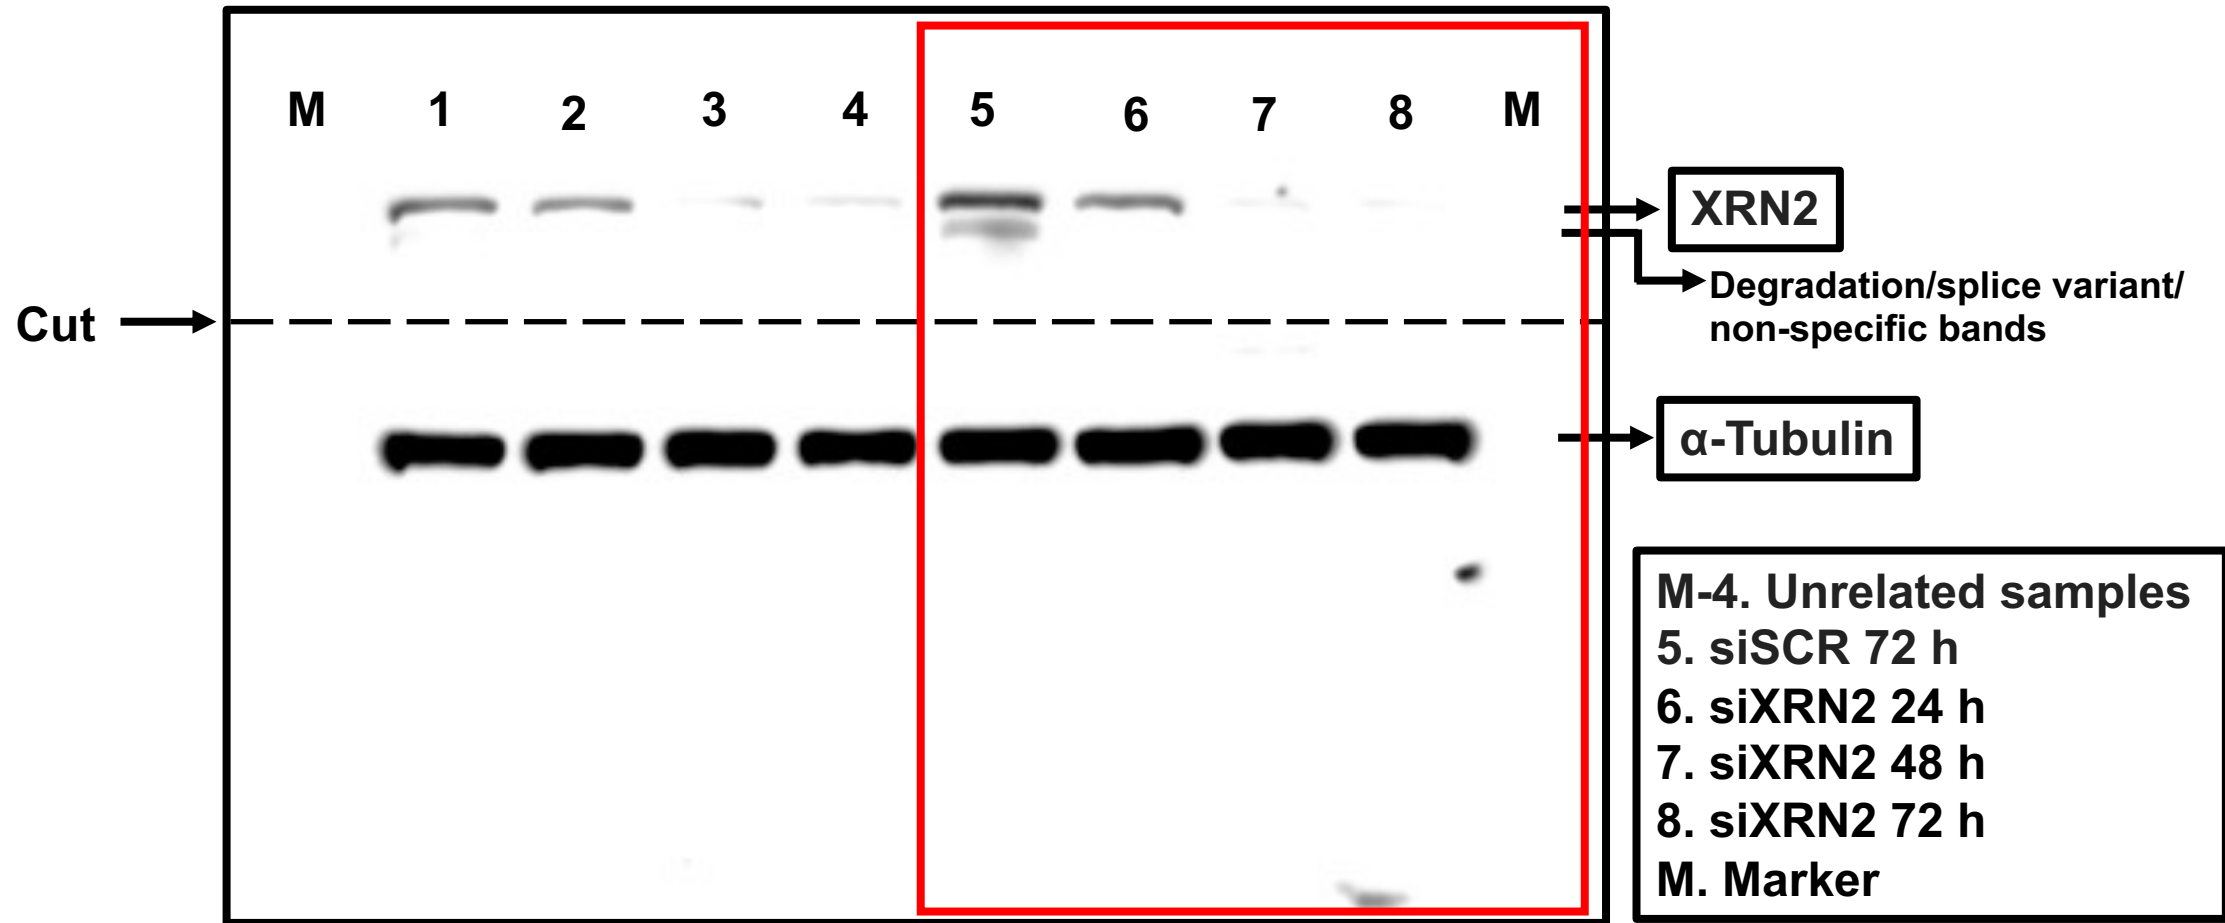

**Figure S7 Figure 7F Supplementary**

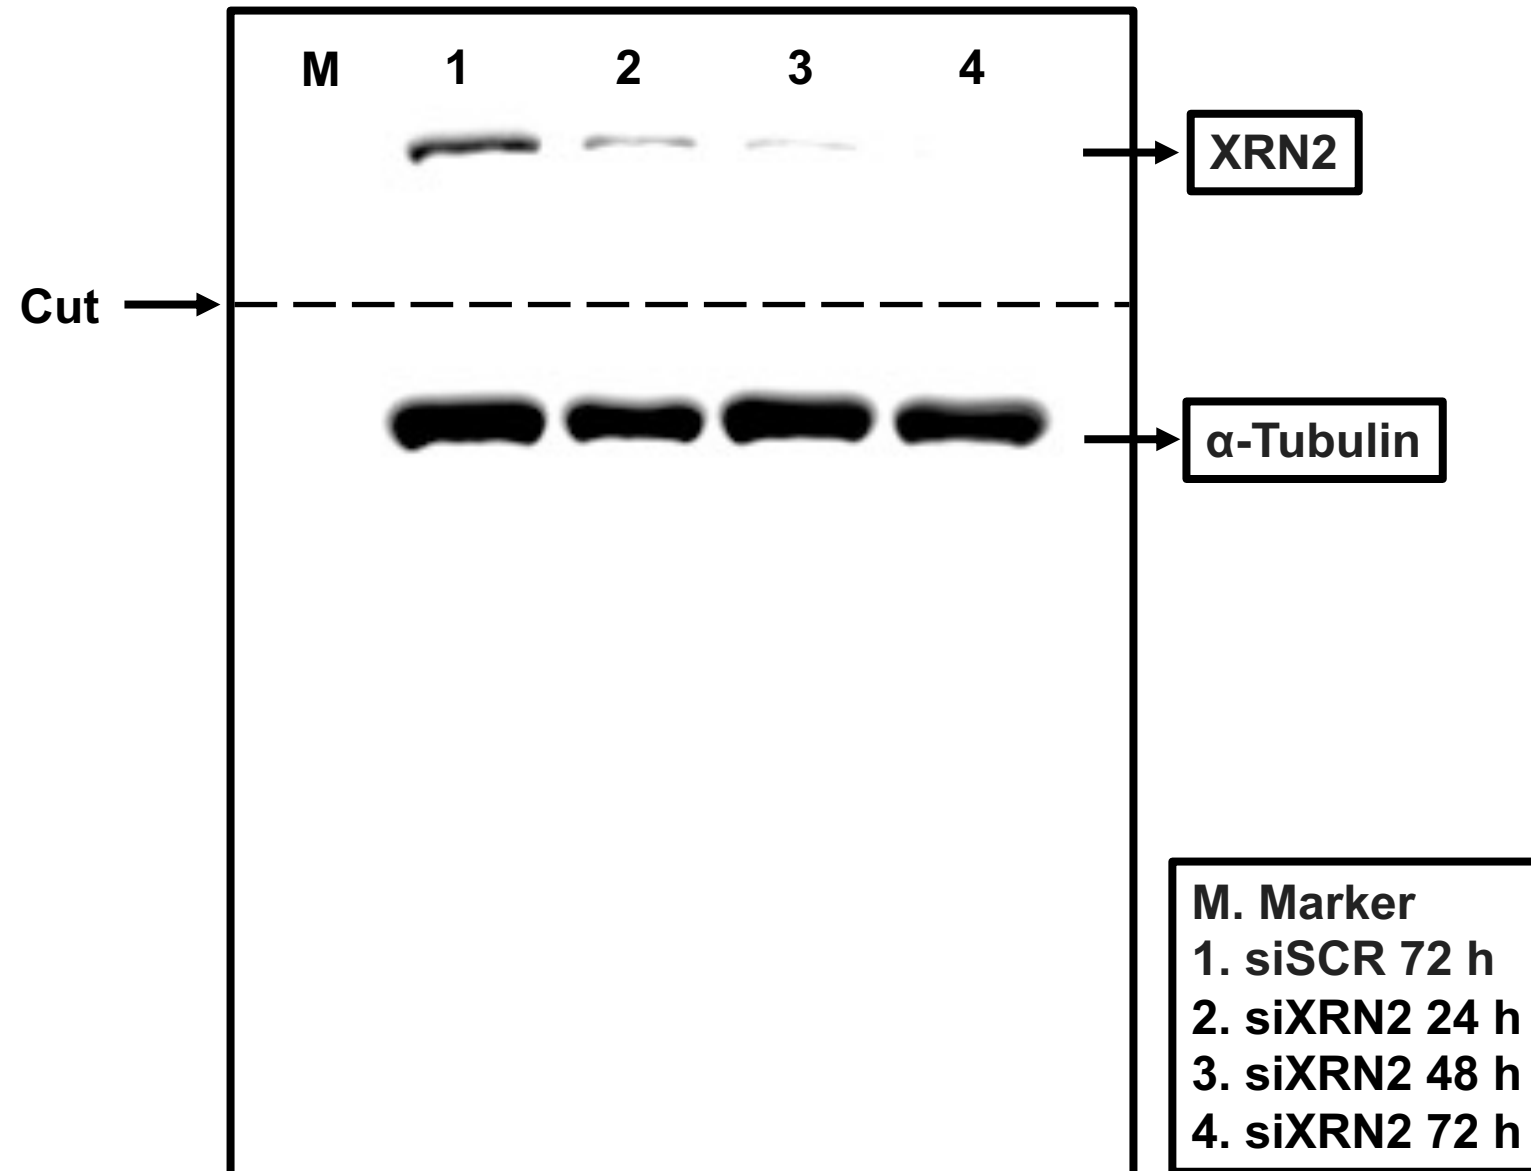

Supplement: s1 [file s1]
